# Supplementary material
Source: PubMed Central journal article supplement (PMC5564378)
Supplement: hdy201728x6.pdf [file hdy201728x6.pdf]

**Table S1.** Summary of the *Malus sieversii* S-alleles and the eight nuclear loci surveyed and the primer sequences used in the study.

| Locus    | Chromosome location | Alignment length (bp) |        |           | Primer sequences                                                                                                | Functional annotation            |
|----------|---------------------|-----------------------|--------|-----------|-----------------------------------------------------------------------------------------------------------------|----------------------------------|
|          |                     | Total                 | Coding | Noncoding |                                                                                                                 |                                  |
| S-allele | 17                  | 543                   | 543    | 0         | S-F1: TTTACGCAGCAATATCAG<br>S-R1: GYGGGGGCARTYTMTGAA<br>S-R2: CAAAGASYGAYCTCAACCAAT<br>S-R3: ACRTTCGGCCAAATAATT | Plant T2 S-RNases                |
| C1       | 1                   | 628                   | 189    | 439       | F: CTCTCTTCCCTCGAGTTCCTTGG<br>R: TTAGACCGCTGAAGGGTAAAGG                                                         | Alcohol dehydrogenase            |
| C9       | 9                   | 435                   | 326    | 109       | F: AGATTTGGTCATGTCCGAGG<br>R: TCGATTGGATTGGTTTCACA                                                              | Transcription factor GRAS        |
| C10      | 10                  | 694                   | 622    | 72        | F: CGAGAAGATCCTAGGCAAATC<br>R: AGCTTCTTCGCTACTTTGCTC                                                            | Polyphenol oxidase               |
| C11      | 11                  | 547                   | 56     | 491       | F: GGATGGACAGCTACTTGGGA<br>R: CTCGATAGCTTCCAAGACGG                                                              | beta-glucosidase BoGH3B-like     |
| C12      | 12                  | 649                   | 37     | 612       | F: GTTACCGATATTCCAGCAACTAC<br>R: GGACTTTCATAACACACTATCTC                                                        | Flowering locus T-like           |
| C15      | 15                  | 936                   | 196    | 740       | F: CCCAACAGGAATCGAGGCTCTTTG<br>R: GCATGATTACCTCTTTCTCCAATCC                                                     | Cullin binding                   |
| C16      | 16                  | 834                   | 180    | 654       | F: CATCCTCAACAGTGAAGCCAAGG<br>R: CTGGATACAGCCTGTGAGCATGG                                                        | Auxin canalisation               |
| C17      | 17                  | 545                   | 357    | 188       | F: ACTTGAAGTTGGGCGAATTG<br>R: CCAAAAGCACGAGCATAACA                                                              | 6-phosphogluconate dehydrogenase |

**Table S2.** Model parameters and their priors used in coalescent simulation and Approximate Bayesian Computation (ABC).

| Parameters             | Prior distribution | Prior ranges     | Interpretation of the parameter                                |
|------------------------|--------------------|------------------|----------------------------------------------------------------|
| $N_{\text{present}}$   | Uniform            | 80000 to 200000  | Ne at present                                                  |
| $N_{\text{ancestral}}$ | Uniform            | 200000 to 600000 | Ne in ancient times                                            |
| $N_b$                  | Uniform            | 20000 to 100000  | Ne during the bottleneck periods                               |
| $T$                    | Log                | 500 to 100000    | Time (before present) when the population size began to change |
| $T_b$                  | Uniform            | 5000 to 35000    | Length of bottleneck periods                                   |
| $r_e$                  | Log                | 1e-9 to 1e-5     | Population growth rate                                         |
| $r_d$                  | Log                | -1e-5 to -1e-9   | Population decline rate                                        |
| $\mu$                  | Uniform            | 0.5e-8 to 2e-8   | Mean mutation rate                                             |

**Table S3.** Genotyping the *S*-locus of *Malus sieversii* based on the three pairs of consensus primers designed for the Maleae S-RNases.

| Samples | Primers                                      |                                              |                                              |
|---------|----------------------------------------------|----------------------------------------------|----------------------------------------------|
|         | <i>S</i> -F1/ <i>S</i> -R1                   | <i>S</i> -F1/ <i>S</i> -R2                   | <i>S</i> -F1/ <i>S</i> -R3                   |
| DX1     | <i>S</i> <sub>8</sub> <i>S</i> <sub>13</sub> |                                              |                                              |
| DX2     | <i>S</i> <sub>12</sub>                       | <i>S</i> <sub>2</sub> <i>S</i> <sub>12</sub> |                                              |
| DX3     | <i>S</i> <sub>8</sub>                        | <i>S</i> <sub>5</sub> <i>S</i> <sub>8</sub>  |                                              |
| DX4     | <i>S</i> <sub>6</sub>                        | <i>S</i> <sub>6</sub> <i>S</i> <sub>9</sub>  |                                              |
| DX5     | <i>S</i> <sub>6</sub>                        | <i>S</i> <sub>2</sub> <i>S</i> <sub>6</sub>  |                                              |
| DX6     | <i>S</i> <sub>11</sub>                       | <i>S</i> <sub>1</sub> <i>S</i> <sub>11</sub> |                                              |
| DX7     | <i>S</i> <sub>6</sub> <i>S</i> <sub>14</sub> |                                              |                                              |
| DX8     | <i>S</i> <sub>13</sub>                       | <i>S</i> <sub>8</sub>                        | <i>S</i> <sub>8</sub> <i>S</i> <sub>13</sub> |
| DX9     |                                              | <i>S</i> <sub>2</sub> <i>S</i> <sub>12</sub> |                                              |
| DX10    |                                              | <i>S</i> <sub>2</sub> <i>S</i> <sub>12</sub> |                                              |
| DX11    | <i>S</i> <sub>3</sub>                        | <i>S</i> <sub>3</sub>                        |                                              |
| DX12    | <i>S</i> <sub>11</sub>                       | <i>S</i> <sub>11</sub>                       |                                              |
| DX13    | <i>S</i> <sub>5</sub>                        | <i>S</i> <sub>5</sub>                        | <i>S</i> <sub>5</sub>                        |
| DX14    | <i>S</i> <sub>11</sub>                       | <i>S</i> <sub>11</sub>                       | <i>S</i> <sub>11</sub>                       |
| EM1     | <i>S</i> <sub>4</sub>                        | <i>S</i> <sub>2</sub> <i>S</i> <sub>4</sub>  |                                              |
| EM2     | <i>S</i> <sub>4</sub>                        | <i>S</i> <sub>3</sub> <i>S</i> <sub>4</sub>  |                                              |
| EM3     | <i>S</i> <sub>1</sub> <i>S</i> <sub>3</sub>  | <i>S</i> <sub>1</sub> <i>S</i> <sub>3</sub>  |                                              |
| EM4     | <i>S</i> <sub>8</sub>                        | <i>S</i> <sub>2</sub> <i>S</i> <sub>8</sub>  |                                              |
| EM5     | <i>S</i> <sub>5</sub>                        | <i>S</i> <sub>2</sub> <i>S</i> <sub>5</sub>  |                                              |
| EM6     | <i>S</i> <sub>5</sub>                        | <i>S</i> <sub>2</sub> <i>S</i> <sub>5</sub>  |                                              |
| EM7     | <i>S</i> <sub>8</sub>                        | <i>S</i> <sub>2</sub> <i>S</i> <sub>8</sub>  |                                              |
| EM8     |                                              | <i>S</i> <sub>3</sub> <i>S</i> <sub>10</sub> |                                              |
| EM9     |                                              | <i>S</i> <sub>2</sub> <i>S</i> <sub>8</sub>  |                                              |
| EM10    |                                              | <i>S</i> <sub>3</sub> <i>S</i> <sub>7</sub>  |                                              |
| EM11    | <b>No amplification</b>                      | <i>S</i> <sub>4</sub>                        | <i>S</i> <sub>4</sub>                        |
| EM12    | <i>S</i> <sub>1</sub>                        | <i>S</i> <sub>1</sub>                        | <i>S</i> <sub>1</sub>                        |
| EM13    | <i>S</i> <sub>1</sub>                        | <i>S</i> <sub>1</sub>                        | <i>S</i> <sub>1</sub>                        |
| EM14    | <i>S</i> <sub>5</sub>                        | <i>S</i> <sub>5</sub>                        | <i>S</i> <sub>5</sub>                        |
| FK1     | <i>S</i> <sub>9</sub>                        | <i>S</i> <sub>2</sub> <i>S</i> <sub>9</sub>  |                                              |
| FK2     | <i>S</i> <sub>1</sub>                        | <i>S</i> <sub>1</sub> <i>S</i> <sub>2</sub>  |                                              |
| FK3     | <i>S</i> <sub>9</sub>                        | <i>S</i> <sub>2</sub> <i>S</i> <sub>9</sub>  |                                              |
| FK4     | <i>S</i> <sub>3</sub> <i>S</i> <sub>5</sub>  | <i>S</i> <sub>3</sub> <i>S</i> <sub>5</sub>  |                                              |
| FK5     | <i>S</i> <sub>3</sub> <i>S</i> <sub>5</sub>  | <i>S</i> <sub>3</sub> <i>S</i> <sub>5</sub>  |                                              |
| FK6     | <i>S</i> <sub>4</sub>                        | <i>S</i> <sub>1</sub> <i>S</i> <sub>4</sub>  |                                              |
| FK7     | <i>S</i> <sub>4</sub> <i>S</i> <sub>7</sub>  |                                              |                                              |
| FK8     | <i>S</i> <sub>4</sub> <i>S</i> <sub>11</sub> |                                              |                                              |
| FK9     | <i>S</i> <sub>4</sub> <i>S</i> <sub>7</sub>  |                                              |                                              |
| FK10    | <i>S</i> <sub>1</sub> <i>S</i> <sub>3</sub>  | <i>S</i> <sub>1</sub> <i>S</i> <sub>3</sub>  |                                              |
| FK11    |                                              | <i>S</i> <sub>4</sub> <i>S</i> <sub>7</sub>  |                                              |
| FK12    |                                              | <i>S</i> <sub>4</sub> <i>S</i> <sub>8</sub>  |                                              |

|      |           |              |              |
|------|-----------|--------------|--------------|
| FK13 |           | $S_3 S_7$    |              |
| FK14 |           | $S_2 S_9$    | $S_2 S_9$    |
| FK15 |           | $S_1 S_6$    | $S_1 S_6$    |
| FK16 | $S_4 S_7$ | $S_4 S_7$    |              |
| FK17 | $S_{11}$  | $S_{11}$     |              |
| MH1  | $S_1$     | $S_2$        |              |
| MH2  | $S_5 S_6$ |              |              |
| MH3  | $S_7 S_8$ |              |              |
| MH4  | $S_4 S_7$ |              |              |
| MH5  | $S_{13}$  | $S_1 S_{13}$ |              |
| MH6  | $S_6 S_7$ | $S_6 S_7$    |              |
| MH7  |           | $S_2 S_5$    |              |
| MH8  |           | $S_4 S_5$    |              |
| MH9  | $S_7$     | $S_7$        | $S_5 S_7$    |
| MH10 |           | $S_1 S_3$    |              |
| MH11 |           | $S_5 S_7$    |              |
| MH12 |           | $S_1 S_7$    |              |
| MH13 |           | $S_6 S_7$    |              |
| MH14 |           | $S_1 S_7$    |              |
| MH15 | $S_8$     | $S_8$        | $S_8$        |
| MH16 | $S_6$     | $S_6$        |              |
| XY1  | $S_4$     | $S_2 S_4$    |              |
| XY2  | $S_4$     | $S_3 S_4$    |              |
| XY3  | $S_6 S_7$ |              |              |
| XY4  | $S_{13}$  | $S_5 S_{13}$ |              |
| XY5  | $S_4$     | $S_3 S_4$    |              |
| XY6  | $S_6 S_9$ | $S_6 S_9$    |              |
| XY7  | $S_3$     | $S_2 S_3$    |              |
| XY8  | $S_4$     | $S_4 S_5$    |              |
| XY9  | $S_4 S_6$ | $S_6$        | $S_6$        |
| XY10 |           | $S_6 S_9$    |              |
| XY11 |           | $S_3 S_{10}$ |              |
| XY12 |           | $S_6 S_{10}$ |              |
| XY13 | $S_{14}$  | $S_{14}$     |              |
| XY14 | $S_3$     | $S_3$        | $S_3$        |
| XY15 | $S_1$     | $S_1$        | $S_1$        |
| XY16 | $S_6$     | $S_6$        | $S_6$        |
| YL1  |           | $S_2 S_5$    |              |
| YL2  | $S_4 S_6$ |              |              |
| YL3  | $S_6$     | $S_6$        | $S_1 S_6$    |
| YL4  | $S_9$     | $S_9 S_{10}$ |              |
| YL5  |           | $S_9 S_{10}$ |              |
| YL6  | $S_{12}$  | $S_{12}$     | $S_1 S_{12}$ |
| YL7  | $S_1$     | $S_1$        | $S_1$        |

|      |    |    |    |
|------|----|----|----|
| YL8  | S1 | S1 | S1 |
| YL9  | S5 | S5 | S5 |
| YL10 | S5 | S5 | S5 |
| YL11 | S8 | S8 | S8 |
| YL12 | S8 | S8 | S8 |
| YL13 | S1 | S1 | S1 |

Blank indicates that no PCR amplification was carried out for that individuals.

**Table S4.** Best hits for the 14 *Malus sieversii* S-RNases through NCBI protein BLAST analyses with default parameters.

| S-RNases  | Length of S-RNases | Best hit                                                              | Accession of the best hit | Query coverage | Identity             |
|-----------|--------------------|-----------------------------------------------------------------------|---------------------------|----------------|----------------------|
| S1        | 173                | <i>Malus domestica</i> Sf-RNase precursor                             | BAA09448.1                | 100%           | 100% (173/173)       |
| S2        | 164                | <i>Pyrus communis</i> Sh-RNase                                        | BAE92268.1                | 100%           | 99% (162/164)        |
|           |                    | <i>Pyrus communis</i> self-incompatibility associated ribonuclease    | AHA43163.1,<br>AHA43162.1 | 100%           | 99% (162/164)        |
| S3        | 169                | <i>Malus domestica</i> S33-Rnase                                      | BAJ10662.1                | 100%           | 100% (169/169)       |
| S4        | 173                | <i>Malus domestica</i> S46-RNase protein                              | ACI03590.1                | 100%           | 99% (172/173)        |
| S5        | 173                | <i>Malus domestica</i> S31-Rnase                                      | AAZ66079.1                | 100%           | 99% (172/173)        |
| S6        | 172                | <i>Malus domestica</i> S21-RNase protein                              | ACI03588.1                | 100%           | 100% (172/172)       |
| S7        | 173                | <i>Malus domestica</i> S26-RNase                                      | AAB70515.1                | 100%           | 99% (172/173)        |
| <b>S8</b> | 174                | <i>Pyrus betulifolia</i> self-incompatibility associated ribonuclease | AGJ00808.1                | 100%           | <b>96% (167/174)</b> |
| <b>S9</b> | 173                | <i>Pyrus communis</i> S-RNase                                         | AAQ98031.1                | 100%           | <b>98% (169/173)</b> |
|           |                    | <i>Pyrus communis</i> Sp-RNase                                        | BAF35963.1                | 100%           | <b>98% (169/174)</b> |
| S10       | 141                | <i>Malus domestica</i> S45-RNase protein                              | ACI03589.1                | 100%           | 100% (141/141)       |
|           |                    | <i>Malus domestica</i> S54-RNase protein                              | ACM48195.1                | 100%           | 100% (141/141)       |
| S11       | 173                | <i>Malus domestica</i> Sd-RNase                                       | BAA92437.1                | 100%           | 100% (173/173)       |
| S12       | 173                | <i>Malus domestica</i> Sg-RNase                                       | BAA76620.1                | 100%           | 100% (173/173)       |
| S13       | 173                | <i>Pyrus communis</i> S-RNase                                         | AAP92530.1                | 100%           | 99% (171/173)        |
|           |                    | <i>Pyrus communis</i> Si-RNase                                        | BAF35960.1                | 100%           | 99% (171/173)        |
| S14       | 179                | <i>Malus domestica</i> S9-RNase                                       | AAA61821.1                | 100%           | 99% (177/178)        |

**Table S5.** List of the 658 S-RNase proteins belonging to the tribe Maleae retrieved from GenBank by NCBI protein BLAST and hmmsearch analyses.

| GenBank accessions<br>of S-RNases | AA number<br>of S-RNases | Annotation information                                                                                                          |
|-----------------------------------|--------------------------|---------------------------------------------------------------------------------------------------------------------------------|
| ACV69910.1                        | 226                      | Pyrus communis self-incompatibility associated ribonuclease gene, S-RNase-S4 allele, complete cds.                              |
| BAE92266.1                        | 226                      | Pyrus communis Sb-RNase gene for Sb-RNase, complete cds.                                                                        |
| BAG16815.1                        | 226                      | Pyrus pyrifolia gene for Sb'-RNase, complete cds.                                                                               |
| AHA43155.1                        | 196                      | Pyrus communis isolate BHS104 self-incompatibility associated ribonuclease (S-RNase) mRNA, S-RNase-S104-2 allele, partial cds.  |
| AAP93141.1                        | 179                      | Pyrus communis cultivar Coscia di Firenze S-RNase (S) gene, Sb allele, exons 1 and 2 and partial cds.                           |
| AHA43156.1                        | 175                      | Pyrus communis isolate SSS104 self-incompatibility associated ribonuclease (S-RNase) mRNA, S-RNase-S104-2 allele, partial cds.  |
| AHA43154.1                        | 165                      | Pyrus communis isolate BALS104 self-incompatibility associated ribonuclease (S-RNase) mRNA, S-RNase-S104-1 allele, partial cds. |
| ABP04109.1                        | 151                      | Pyrus communis self-incompatibility associated ribonuclease (S) gene, S-4 allele, partial cds.                                  |
| AGO20665.1                        | 136                      | Pyrus communis cultivar Bulghar NO.II S4-RNase gene, partial cds.                                                               |
| AGJ00897.1                        | 135                      | Pyrus communis cultivar Coscia S4-RNase (S4-RNase) gene, partial cds.                                                           |
| AGJ00898.1                        | 135                      | Pyrus communis cultivar Conference S4-RNase (S4-RNase) gene, partial cds.                                                       |
| AGJ00904.1                        | 135                      | Pyrus communis cultivar Krus Siehan S4-RNase (S4-RNase) gene, partial cds.                                                      |
| AGJ00905.1                        | 135                      | Pyrus communis cultivar Beurre Diel S4-RNase (S4-RNase) gene, partial cds.                                                      |
| AGJ00906.1                        | 135                      | Pyrus communis cultivar Khoj11 S4-RNase (S4-RNase) gene, partial cds.                                                           |
| AGJ00909.1                        | 135                      | Pyrus communis cultivar Khoj2 S4-RNase (S4-RNase) gene, partial cds.                                                            |
| ABI47916.1                        | 109                      | Pyrus communis cultivar Alexandrine Douillard S-RNase (S) gene, Sb allele, partial cds.                                         |
| ABI47933.1                        | 109                      | Pyrus communis cultivar Carapinheira S-RNase (S) gene, Sb allele, partial cds.                                                  |
| AGF70071.1                        | 63                       | Pyrus pyraaster S-RNase (S-RNase) gene, S-RNase-S51.01 allele, partial cds.                                                     |
| AGF70072.1                        | 63                       | Pyrus pyraaster S-RNase (S-RNase) gene, S-RNase-S51.02 allele, partial cds.                                                     |
| AGF70074.1                        | 63                       | Pyrus pyraaster S-RNase (S-RNase) gene, S-RNase-S51.04 allele, partial cds.                                                     |

|            |     |                                                                                                                                     |
|------------|-----|-------------------------------------------------------------------------------------------------------------------------------------|
| AGF70075.1 | 63  | <i>Pyrus pyra</i> ster S-RNase (S-RNase) gene, S-RNase-S51.05 allele, partial cds.                                                  |
| ABU92568.1 | 227 | <i>Pyrus ussuriensis</i> voucher Tan 3 S40-RNase gene, complete cds.                                                                |
| BAN66318.1 | 227 | <i>Pyrus communis</i> S gene for S-RNase, complete cds, cultivar: Cure.                                                             |
| ACI03587.1 | 178 | <i>Malus x domestica</i> S11-RNase protein gene, partial cds.                                                                       |
| ABW90994.1 | 150 | <i>Pyrus communis</i> self-incompatibility associated ribonuclease gene, S-RNase-S22 allele, partial cds.                           |
| AIG55249.1 | 117 | <i>Malus spectabilis</i> self-incompatibility ribonuclease (S-RNase) gene, S-RNase-S11 allele, partial cds.                         |
| ABI93615.1 | 66  | <i>Pyrus ussuriensis</i> S40-RNase gene, partial cds.                                                                               |
| BAK68757.1 | 66  | <i>Malus x domestica</i> S11-RNase gene for Pink Pearl S11-RNase, partial cds.                                                      |
| AGF69936.1 | 64  | <i>Pyrus pyra</i> ster S-RNase (S-RNase) gene, S-RNase-S39.01 allele, partial cds.                                                  |
| AGF69937.1 | 64  | <i>Pyrus pyra</i> ster S-RNase (S-RNase) gene, S-RNase-S39.02 allele, partial cds.                                                  |
| AGF69939.1 | 64  | <i>Pyrus pyra</i> ster S-RNase (S-RNase) gene, S-RNase-S39.04 allele, partial cds.                                                  |
| AGF69941.1 | 64  | <i>Pyrus pyra</i> ster S-RNase (S-RNase) gene, S-RNase-S39.07 allele, partial cds.                                                  |
| AGF69942.1 | 64  | <i>Pyrus pyra</i> ster S-RNase (S-RNase) gene, S-RNase-S39.08 allele, partial cds.                                                  |
| AGF69944.1 | 64  | <i>Pyrus pyra</i> ster S-RNase (S-RNase) gene, S-RNase-S39.10 allele, partial cds.                                                  |
| AGF69947.1 | 64  | <i>Pyrus pyra</i> ster S-RNase (S-RNase) gene, S-RNase-S39.13 allele, partial cds.                                                  |
| BAC75873.1 | 54  | <i>Malus x domestica</i> gene for S14-RNase, partial cds, cultivar:Jacques Lebel.                                                   |
| BAC85101.1 | 54  | <i>Malus x domestica</i> S11 gene for S11-RNase, partial cds.                                                                       |
| ABR23521.1 | 227 | <i>Pyrus sinkiangensis</i> isolate huachangba S22-RNase gene, complete cds.                                                         |
| BAE92268.1 | 227 | <i>Pyrus communis</i> Sh-RNase gene for Sh-RNase, complete cds.                                                                     |
| AHA43162.1 | 196 | <i>Pyrus communis</i> isolate BHS107 self-incompatibility associated ribonuclease (S-RNase) mRNA, S-RNase-S107 allele, partial cds. |
| AHA43163.1 | 196 | <i>Pyrus communis</i> isolate CRS107 self-incompatibility associated ribonuclease (S-RNase) mRNA, S-RNase-S107 allele, partial cds. |
| AHA43164.1 | 196 | <i>Pyrus communis</i> isolate DS107 self-incompatibility associated ribonuclease (S-RNase) mRNA, S-RNase-S107 allele, partial cds.  |
| AAS66772.1 | 178 | <i>Pyrus communis</i> cultivar Bosc S-RNase (S-RNase) gene, S-RNase-Sh allele, partial cds.                                         |



|            |     |                                                                                                                                      |
|------------|-----|--------------------------------------------------------------------------------------------------------------------------------------|
| AHA43161.1 | 161 | <i>Pyrus communis</i> isolate BES107 self-incompatibility associated ribonuclease (S-RNase) mRNA, S-RNase-S107 allele, partial cds.  |
| ABR08574.1 | 150 | <i>Pyrus communis</i> self-incompatibility associated ribonuclease (S) gene, S7 allele, partial cds.                                 |
| AGJ00903.1 | 138 | <i>Pyrus communis</i> cultivar Shekari S7-RNase (S7-RNase) gene, partial cds.                                                        |
| AGJ00902.1 | 136 | <i>Pyrus communis</i> cultivar shah miveh S7-RNase (S7-RNase) gene, partial cds.                                                     |
| AGJ00907.1 | 136 | <i>Pyrus communis</i> cultivar Domkaj S7-RNase (S7-RNase) gene, partial cds.                                                         |
| AGJ00908.1 | 136 | <i>Pyrus communis</i> cultivar Khoj1 S7-RNase (S7-RNase) gene, partial cds.                                                          |
| AGO20668.1 | 136 | <i>Pyrus communis</i> cultivar Shahak S7-RNase gene, partial cds.                                                                    |
| AGF70083.1 | 64  | <i>Pyrus pyrastrer</i> S-RNase (S-RNase) gene, S-RNase-S53.01 allele, partial cds.                                                   |
| AGF70086.1 | 64  | <i>Pyrus pyrastrer</i> S-RNase (S-RNase) gene, S-RNase-S53.04 allele, partial cds.                                                   |
| ACC64006.1 | 227 | <i>Pyrus communis</i> cultivar Passe Crassane self-incompatibility associated ribonuclease (S) gene, S21 allele, complete cds.       |
| ACC64007.1 | 227 | <i>Pyrus communis</i> cultivar Abugo self-incompatibility associated ribonuclease (S) gene, S21(stylar mutant) allele, complete cds. |
| BAE92263.2 | 227 | <i>Pyrus communis</i> Sr-RNase gene for Sr-RNase, complete cds.                                                                      |
| ABY87315.1 | 179 | <i>Pyrus syriaca</i> S3 RNase gene, partial cds.                                                                                     |
| ABW90993.1 | 151 | <i>Pyrus communis</i> self-incompatibility associated ribonuclease gene, S-RNase-S21 allele, partial cds.                            |
| AGJ00901.1 | 137 | <i>Pyrus communis</i> cultivar Esfarayeni Sr-RNase (Sr-RNase) gene, partial cds.                                                     |
| AGO20666.1 | 137 | <i>Pyrus communis</i> cultivar Bulghar NO.II Sr-RNase gene, partial cds.                                                             |
| AGO20667.1 | 137 | <i>Pyrus communis</i> cultivar Dargazi Sr-RNase gene, partial cds.                                                                   |
| ABI47931.1 | 111 | <i>Pyrus communis</i> cultivar Passe Crassane S-RNase (S) gene, Sr allele, partial cds.                                              |
| AGF69922.1 | 65  | <i>Pyrus pyrastrer</i> S-RNase (S-RNase) gene, S-RNase-S36.01 allele, partial cds.                                                   |
| AGF69925.1 | 65  | <i>Pyrus pyrastrer</i> S-RNase (S-RNase) gene, S-RNase-S36.04 allele, partial cds.                                                   |
| AGF69928.1 | 65  | <i>Pyrus pyrastrer</i> S-RNase (S-RNase) gene, S-RNase-S36.07 allele, partial cds.                                                   |
| AGF69929.1 | 65  | <i>Pyrus pyrastrer</i> S-RNase (S-RNase) gene, S-RNase-S36.08 allele, partial cds.                                                   |
| AGF69930.1 | 65  | <i>Pyrus pyrastrer</i> S-RNase (S-RNase) gene, S-RNase-S36.09 allele, partial cds.                                                   |
| AGF69931.1 | 65  | <i>Pyrus pyrastrer</i> S-RNase (S-RNase) gene, S-RNase-S36.10 allele, partial cds.                                                   |

|            |     |                                                                                                                              |
|------------|-----|------------------------------------------------------------------------------------------------------------------------------|
| AGF69973.1 | 65  | Pyrus pyraaster S-RNase (S-RNase) gene, S-RNase-S42.01 allele, partial cds.                                                  |
| AGF69976.1 | 65  | Pyrus pyraaster S-RNase (S-RNase) gene, S-RNase-S42.04 allele, partial cds.                                                  |
| AGF69978.1 | 65  | Pyrus pyraaster S-RNase (S-RNase) gene, S-RNase-S42.06 allele, partial cds.                                                  |
| AGF69981.1 | 65  | Pyrus pyraaster S-RNase (S-RNase) gene, S-RNase-S42.09 allele, partial cds.                                                  |
| AGF69984.1 | 65  | Pyrus pyraaster S-RNase (S-RNase) gene, S-RNase-S42.12 allele, partial cds.                                                  |
| AGF69985.1 | 65  | Pyrus pyraaster S-RNase (S-RNase) gene, S-RNase-S42.13 allele, partial cds.                                                  |
| AGF69987.1 | 65  | Pyrus pyraaster S-RNase (S-RNase) gene, S-RNase-S42.15 allele, partial cds.                                                  |
| AGF69988.1 | 65  | Pyrus pyraaster S-RNase (S-RNase) gene, S-RNase-S42.16 allele, partial cds.                                                  |
| AGF69989.1 | 65  | Pyrus pyraaster S-RNase (S-RNase) gene, S-RNase-S42.17 allele, partial cds.                                                  |
| AGF69990.1 | 65  | Pyrus pyraaster S-RNase (S-RNase) gene, S-RNase-S42.18 allele, partial cds.                                                  |
| AGF70002.1 | 65  | Pyrus pyraaster S-RNase (S-RNase) gene, S-RNase-S42.30 allele, partial cds.                                                  |
| AGF70003.1 | 65  | Pyrus pyraaster S-RNase (S-RNase) gene, S-RNase-S42.31 allele, partial cds.                                                  |
| AGF70004.1 | 65  | Pyrus pyraaster S-RNase (S-RNase) gene, S-RNase-S42.32 allele, partial cds.                                                  |
| AGF70005.1 | 65  | Pyrus pyraaster S-RNase (S-RNase) gene, S-RNase-S42.33 allele, partial cds.                                                  |
| AGF70007.1 | 65  | Pyrus pyraaster S-RNase (S-RNase) gene, S-RNase-S42.35 allele, partial cds.                                                  |
| BAE92265.1 | 232 | Pyrus communis Se-RNase gene for Se-RNase, complete cds.                                                                     |
| AHA43145.1 | 200 | Pyrus communis isolate TVS101 self-incompatibility associated ribonuclease (S-RNase) mRNA, S-RNase-S101 allele, partial cds. |
| AHA43146.1 | 181 | Pyrus communis isolate PHS101 self-incompatibility associated ribonuclease (S-RNase) mRNA, S-RNase-S101 allele, partial cds. |
| ABG54497.1 | 169 | Pyrus communis cultivar Rocha S-RNase (S) gene, Se allele, partial cds.                                                      |
| ABP04106.1 | 155 | Pyrus communis self-incompatibility associated ribonuclease (S) gene, S-1 allele, partial cds.                               |
| ABI47918.1 | 115 | Pyrus communis cultivar Clapp's Favourite S-RNase (S) gene, Se allele, partial cds.                                          |
| ABI47924.1 | 115 | Pyrus communis cultivar Beurre Precoce Morettini S-RNase (S) gene, Se allele, partial cds.                                   |
| ABI47927.1 | 115 | Pyrus communis cultivar Williams S-RNase (S) gene, Se allele, partial cds.                                                   |
| ABI48530.1 | 103 | Pyrus ussuriensis voucher X. F. Tan 9181 (CFSTU) S37-RNase gene, partial cds.                                                |

|            |     |                                                                                                                                    |
|------------|-----|------------------------------------------------------------------------------------------------------------------------------------|
| ABI47932.1 | 79  | <i>Pyrus communis</i> cultivar Amendoa S-RNase (S) gene, Se allele, partial cds.                                                   |
| AAZ04305.1 | 71  | <i>Pyrus pyrifolia</i> S32-RNase gene, partial cds.                                                                                |
| ACK99541.1 | 71  | <i>Pyrus ussuriensis</i> cultivar Xiaoxiangshui S-RNase (S) gene, partial cds.                                                     |
| CAD29715.1 | 48  | <i>Pyrus communis</i> partial Se-RNase gene, exon 1.                                                                               |
| ABI48532.1 | 227 | <i>Pyrus ussuriensis</i> voucher X. F. Tan 9183 (CFSTU) S35-RNase gene, complete cds.                                              |
| BAE92264.1 | 227 | <i>Pyrus communis</i> Sd-RNase gene for Sd-RNase, complete cds.                                                                    |
| AHA43165.1 | 196 | <i>Pyrus communis</i> isolate LS108 self-incompatibility associated ribonuclease (S-RNase) mRNA, S-RNase-S108 allele, partial cds. |
| AHA43166.1 | 196 | <i>Pyrus communis</i> isolate CS108 self-incompatibility associated ribonuclease (S-RNase) mRNA, S-RNase-S108 allele, partial cds. |
| AAS66773.1 | 180 | <i>Pyrus communis</i> cultivar Kalle S-RNase (S-RNase) gene, S-RNase-Sd allele, partial cds.                                       |
| ABR08575.1 | 152 | <i>Pyrus communis</i> self-incompatibility associated ribonuclease (S) gene, S8 allele, partial cds.                               |
| AGJ00896.1 | 137 | <i>Pyrus communis</i> cultivar Krusalun S8-RNase (S8-RNase) gene, partial cds.                                                     |
| ABI47919.1 | 111 | <i>Pyrus communis</i> cultivar Clapp's Favourite S-RNase (S) gene, Sd allele, partial cds.                                         |
| ABI47921.1 | 111 | <i>Pyrus communis</i> cultivar Clapp's Rouge S-RNase (S) gene, Sd allele, partial cds.                                             |
| CAD30837.1 | 75  | <i>Pyrus communis</i> partial RNase gene for RNase protein, exons 1 and 2, allele d.                                               |
| AGF70016.1 | 67  | <i>Pyrus pyraaster</i> S-RNase (S-RNase) gene, S-RNase-S44.01 allele, partial cds.                                                 |
| AGF70017.1 | 67  | <i>Pyrus pyraaster</i> S-RNase (S-RNase) gene, S-RNase-S44.02 allele, partial cds.                                                 |
| AGF70025.1 | 67  | <i>Pyrus pyraaster</i> S-RNase (S-RNase) gene, S-RNase-S44.10 allele, partial cds.                                                 |
| ACL14815.1 | 178 | <i>Pyrus syriaca</i> isolate manara 350 S11-RNase gene, partial cds.                                                               |
| AGF69884.1 | 65  | <i>Pyrus pyraaster</i> S-RNase (S-RNase) gene, S-RNase-S32.01 allele, partial cds.                                                 |
| AGF69885.1 | 65  | <i>Pyrus pyraaster</i> S-RNase (S-RNase) gene, S-RNase-S32.02 allele, partial cds.                                                 |
| AGF69889.1 | 65  | <i>Pyrus pyraaster</i> S-RNase (S-RNase) gene, S-RNase-S32.06 allele, partial cds.                                                 |
| AGF69890.1 | 65  | <i>Pyrus pyraaster</i> S-RNase (S-RNase) gene, S-RNase-S32.07 allele, partial cds.                                                 |
| AGF69892.1 | 65  | <i>Pyrus pyraaster</i> S-RNase (S-RNase) gene, S-RNase-S32.09 allele, partial cds.                                                 |
| AGF69895.1 | 65  | <i>Pyrus pyraaster</i> S-RNase (S-RNase) gene, S-RNase-S32.12 allele, partial cds.                                                 |

|            |     |                                                                                                            |
|------------|-----|------------------------------------------------------------------------------------------------------------|
| AGF69898.1 | 65  | <i>Pyrus pyraaster</i> S-RNase (S-RNase) gene, S-RNase-S32.15 allele, partial cds.                         |
| AGF69899.1 | 65  | <i>Pyrus pyraaster</i> S-RNase (S-RNase) gene, S-RNase-S32.16 allele, partial cds.                         |
| AGF69900.1 | 65  | <i>Pyrus pyraaster</i> S-RNase (S-RNase) gene, S-RNase-S32.17 allele, partial cds.                         |
| AGF69901.1 | 65  | <i>Pyrus pyraaster</i> S-RNase (S-RNase) gene, S-RNase-S32.18 allele, partial cds.                         |
| AGF69902.1 | 65  | <i>Pyrus pyraaster</i> S-RNase (S-RNase) gene, S-RNase-S32.19 allele, partial cds.                         |
| BAA28354.1 | 228 | <i>Pyrus pyrifolia</i> gene for S4-RNase, complete cds.                                                    |
| BAA77692.1 | 228 | <i>Pyrus pyrifolia</i> gene for S4-RNase, complete cds.                                                    |
| BAG07417.1 | 228 | <i>Pyrus pyrifolia</i> S4-RNase, S4F-box0 genes for S ribonuclease, hypothetical protein, complete cds.    |
| BAJ52225.1 | 228 | <i>Pyrus pyrifolia</i> genes for F-box proteins, S ribonuclease, complete cds, haplotype: S4.              |
| BAA08474.1 | 223 | <i>Pyrus pyrifolia</i> mRNA for ribonuclease, complete cds.                                                |
| ACL68357.1 | 180 | <i>Malus kansuensis</i> S51-RNase protein gene, partial cds.                                               |
| AIG55252.1 | 146 | <i>Malus prunifolia</i> self-incompatibility ribonuclease (S-RNase) gene, S-RNase-Se allele, partial cds.  |
| AGF70009.1 | 65  | <i>Pyrus pyraaster</i> S-RNase (S-RNase) gene, S-RNase-S43.01 allele, partial cds.                         |
| AGF70013.1 | 65  | <i>Pyrus pyraaster</i> S-RNase (S-RNase) gene, S-RNase-S43.05 allele, partial cds.                         |
| AGF70015.1 | 65  | <i>Pyrus pyraaster</i> S-RNase (S-RNase) gene, S-RNase-S43.07 allele, partial cds.                         |
| ACD62802.1 | 49  | <i>Pyrus pyraaster</i> S-RNase (S) gene, S31_(G6-8) allele, partial cds.                                   |
| ABR23523.1 | 227 | <i>Pyrus ussuriensis</i> isolate jingbai S30-RNase gene, complete cds.                                     |
| AHA90950.1 | 227 | <i>Pyrus communis</i> self-incompatibility ribonuclease (S-RNase) gene, S-RNase-S126 allele, complete cds. |
| BAH24174.1 | 227 | <i>Pyrus pyrifolia</i> gene for S30-RNase, complete cds, cultivar: Hogyoku.                                |
| ACL14813.1 | 179 | <i>Pyrus korshinskyi</i> isolate botanical garden jerusalem 1 S9-RNase gene, partial cds.                  |
| AAW56851.1 | 67  | <i>Pyrus ussuriensis</i> S30-RNase (S30-RNase) gene, partial cds.                                          |
| ABC54951.1 | 67  | <i>Pyrus sinkiangensis</i> S35-RNase gene, partial cds.                                                    |
| AGF70077.1 | 65  | <i>Pyrus pyraaster</i> S-RNase (S-RNase) gene, S-RNase-S52.02 allele, partial cds.                         |
| AGF70078.1 | 65  | <i>Pyrus pyraaster</i> S-RNase (S-RNase) gene, S-RNase-S52.03 allele, partial cds.                         |
| AGF70080.1 | 65  | <i>Pyrus pyraaster</i> S-RNase (S-RNase) gene, S-RNase-S52.05 allele, partial cds.                         |
| AGF70081.1 | 65  | <i>Pyrus pyraaster</i> S-RNase (S-RNase) gene, S-RNase-S52.06 allele, partial cds.                         |

|            |     |                                                                                                                |
|------------|-----|----------------------------------------------------------------------------------------------------------------|
| AGF70082.1 | 65  | <i>Pyrus pyraaster</i> S-RNase (S-RNase) gene, S-RNase-S52.07 allele, partial cds.                             |
| BAF35961.1 | 228 | <i>Pyrus communis</i> gene for Sm-RNase, complete cds.                                                         |
| AAN87036.1 | 179 | <i>Pyrus communis</i> sm s-RNase gene, partial cds.                                                            |
| ABW90991.1 | 151 | <i>Pyrus communis</i> self-incompatibility associated ribonuclease gene, S-RNase-Sm allele, partial cds.       |
| AGF70031.1 | 65  | <i>Pyrus pyraaster</i> S-RNase (S-RNase) gene, S-RNase-S47.03 allele, partial cds.                             |
| AGF70037.1 | 65  | <i>Pyrus pyraaster</i> S-RNase (S-RNase) gene, S-RNase-S47.09 allele, partial cds.                             |
| AGF70044.1 | 65  | <i>Pyrus pyraaster</i> S-RNase (S-RNase) gene, S-RNase-S47.16 allele, partial cds.                             |
| AGF70047.1 | 65  | <i>Pyrus pyraaster</i> S-RNase (S-RNase) gene, S-RNase-S47.19 allele, partial cds.                             |
| AGF70048.1 | 65  | <i>Pyrus pyraaster</i> S-RNase (S-RNase) gene, S-RNase-S47.20 allele, partial cds.                             |
| AGF70050.1 | 65  | <i>Pyrus pyraaster</i> S-RNase (S-RNase) gene, S-RNase-S47.22 allele, partial cds.                             |
| AGF70051.1 | 65  | <i>Pyrus pyraaster</i> S-RNase (S-RNase) gene, S-RNase-S47.23 allele, partial cds.                             |
| ABQ63395.1 | 228 | <i>Pyrus sinkiangensis</i> S28-RNase gene, complete cds.                                                       |
| ADB85480.1 | 228 | <i>Malus spectabilis</i> self-incompatibility ribonuclease S3 (S-RNase) mRNA, S-RNase-S3 allele, complete cds. |
| BAC65223.1 | 228 | <i>Pyrus pyrifolia</i> gene for S8-RNase, complete cds.                                                        |
| ACM48194.1 | 179 | <i>Malus x domestica</i> S53-RNase protein gene, partial cds.                                                  |
| ABB05533.1 | 67  | <i>Pyrus pyrifolia</i> cultivar Huangli S34-RNase (S) gene, partial cds.                                       |
| ADB85481.1 | 66  | <i>Malus spectabilis</i> self-incompatibility ribonuclease S3 (S-RNase) gene, S-RNase-S3 allele, partial cds.  |
| AGF69911.1 | 65  | <i>Pyrus pyraaster</i> S-RNase (S-RNase) gene, S-RNase-S33.01 allele, partial cds.                             |
| AGF69912.1 | 65  | <i>Pyrus pyraaster</i> S-RNase (S-RNase) gene, S-RNase-S33.02 allele, partial cds.                             |
| AGF69913.1 | 65  | <i>Pyrus pyraaster</i> S-RNase (S-RNase) gene, S-RNase-S33.03 allele, partial cds.                             |
| BAA96352.1 | 227 | <i>Malus domestica</i> Se mRNA for Se-RNase, complete cds.                                                     |
| BAA88846.1 | 200 | <i>Malus domestica</i> mRNA for S-RNase I, partial cds.                                                        |
| AIG55237.1 | 146 | <i>Malus toringoides</i> self-incompatibility ribonuclease (S-RNase) gene, S-RNase-Se allele, partial cds.     |
| AIG55243.1 | 146 | <i>Malus sikkimensis</i> self-incompatibility ribonuclease (S-RNase) gene, S-RNase-Se allele, partial cds.     |
| AAG35606.1 | 119 | <i>Malus x domestica</i> S-RNase gene, s28 allele, partial cds.                                                |
| AEI26159.1 | 67  | <i>Malus x domestica</i> cultivar Gyogyi piros S-ribonuclease (S) gene, S28 allele, partial cds.               |

|            |     |                                                                                                           |
|------------|-----|-----------------------------------------------------------------------------------------------------------|
| AEI26160.1 | 67  | <i>Malus x domestica</i> cultivar Orbai alma S-ribonuclease (S) gene, S28 allele, partial cds.            |
| AEI26161.1 | 67  | <i>Malus x domestica</i> cultivar Vajki alma S-ribonuclease (S) gene, S28 allele, partial cds.            |
| BAB47145.1 | 54  | <i>Malus x domestica</i> gene for Se-RNase, partial cds.                                                  |
| BAA92437.1 | 228 | <i>Malus domestica</i> Sd mRNA for Sd-RNase, complete cds.                                                |
| AAA61820.1 | 179 | <i>Malus domestica</i> S7-RNase (S) mRNA, partial cds.                                                    |
| ABZ81717.1 | 67  | <i>Malus x domestica</i> cultivar Indo S7-RNase (S-RNase) gene, S-RNase-S7 allele, partial cds.           |
| AEV40690.1 | 67  | <i>Malus x domestica</i> cultivar Fekete tanyeralma S7-ribonuclease (S7) gene, partial cds.               |
| AEV40691.1 | 67  | <i>Malus x domestica</i> cultivar Borkormos renet S7-ribonuclease (S7) gene, partial cds.                 |
| AEV40692.1 | 67  | <i>Malus x domestica</i> cultivar Beregi sovari S7-ribonuclease (S7) gene, partial cds.                   |
| AEV40693.1 | 67  | <i>Malus x domestica</i> cultivar Zold sovari S7-ribonuclease (S7) gene, partial cds.                     |
| BAB47143.1 | 54  | <i>Malus x domestica</i> gene for Sd-RNase, partial cds.                                                  |
| BAN66319.1 | 228 | <i>Pyrus communis</i> S gene for S-RNase, complete cds, cultivar: Triomphe de Jodoigne.                   |
| ABW90995.1 | 151 | <i>Pyrus communis</i> self-incompatibility associated ribonuclease gene, S-RNase-S23 allele, partial cds. |
| ABG49102.1 | 99  | <i>Pyrus pyrifolia</i> S16-RNase gene, partial cds.                                                       |
| AAZ04304.1 | 67  | <i>Pyrus pyrifolia</i> S31-RNase gene, partial cds.                                                       |
| AGF70052.1 | 65  | <i>Pyrus pyraaster</i> S-RNase (S-RNase) gene, S-RNase-S48.01 allele, partial cds.                        |
| AGF70053.1 | 65  | <i>Pyrus pyraaster</i> S-RNase (S-RNase) gene, S-RNase-S48.02 allele, partial cds.                        |
| AGF70054.1 | 65  | <i>Pyrus pyraaster</i> S-RNase (S-RNase) gene, S-RNase-S48.03 allele, partial cds.                        |
| AGF70057.1 | 65  | <i>Pyrus pyraaster</i> S-RNase (S-RNase) gene, S-RNase-S48.06 allele, partial cds.                        |
| ABR23519.1 | 210 | <i>Pyrus ussuriensis</i> isolate longxiang S42-RNase gene, partial cds.                                   |
| ABK79086.1 | 97  | <i>Pyrus ussuriensis</i> cultivar Longxiang S42-RNase gene, partial cds.                                  |
| AGF70063.1 | 63  | <i>Pyrus pyraaster</i> S-RNase (S-RNase) gene, S-RNase-S50.01 allele, partial cds.                        |
| AGF70065.1 | 63  | <i>Pyrus pyraaster</i> S-RNase (S-RNase) gene, S-RNase-S50.03 allele, partial cds.                        |
| AGF70066.1 | 63  | <i>Pyrus pyraaster</i> S-RNase (S-RNase) gene, S-RNase-S50.04 allele, partial cds.                        |
| AGF70067.1 | 63  | <i>Pyrus pyraaster</i> S-RNase (S-RNase) gene, S-RNase-S50.05 allele, partial cds.                        |
| AGF70068.1 | 63  | <i>Pyrus pyraaster</i> S-RNase (S-RNase) gene, S-RNase-S50.06 allele, partial cds.                        |

|            |     |                                                                                                                                     |
|------------|-----|-------------------------------------------------------------------------------------------------------------------------------------|
| AGF70070.1 | 63  | <i>Pyrus pyraaster</i> S-RNase (S-RNase) gene, S-RNase-S50.08 allele, partial cds.                                                  |
| BAE92262.1 | 229 | <i>Pyrus communis</i> S1-RNase gene for S1-RNase, complete cds.                                                                     |
| AHA43150.1 | 207 | <i>Pyrus communis</i> isolate NFS102 self-incompatibility associated ribonuclease (S-RNase) mRNA, S-RNase-S102 allele, partial cds. |
| AHA43147.1 | 198 | <i>Pyrus communis</i> isolate CRS102 self-incompatibility associated ribonuclease (S-RNase) mRNA, S-RNase-S102 allele, partial cds. |
| AHA43148.1 | 197 | <i>Pyrus communis</i> isolate ES102 self-incompatibility associated ribonuclease (S-RNase) mRNA, S-RNase-S102 allele, partial cds.  |
| AHA43149.1 | 197 | <i>Pyrus communis</i> isolate LS102 self-incompatibility associated ribonuclease (S-RNase) mRNA, S-RNase-S102 allele, partial cds.  |
| AAM51635.1 | 180 | <i>Pyrus communis</i> S-RNase (S) gene, S1 allele, exons 1 and 2 and partial cds.                                                   |
| ABP04107.1 | 152 | <i>Pyrus communis</i> self-incompatibility associated ribonuclease (S) gene, S-2 allele, partial cds.                               |
| BAN33744.1 | 227 | <i>Pyrus communis</i> gene for S25-RNase, complete cds.                                                                             |
| AHA43170.1 | 196 | <i>Pyrus communis</i> isolate DS125 self-incompatibility associated ribonuclease (S-RNase) mRNA, S-RNase-S125 allele, partial cds.  |
| AHA43171.1 | 196 | <i>Pyrus communis</i> isolate NPS125 self-incompatibility associated ribonuclease (S-RNase) mRNA, S-RNase-S125 allele, partial cds. |
| AHA43173.1 | 194 | <i>Pyrus communis</i> isolate XS125 self-incompatibility associated ribonuclease (S-RNase) mRNA, S-RNase-S125 allele, partial cds.  |
| AHA43172.1 | 184 | <i>Pyrus communis</i> isolate NFS125 self-incompatibility associated ribonuclease (S-RNase) mRNA, S-RNase-S125 allele, partial cds. |
| ACJ61509.1 | 150 | <i>Pyrus communis</i> self-incompatibility associated ribonuclease mRNA, S-RNase-S25 allele, partial cds.                           |
| ACJ61510.1 | 43  | <i>Pyrus communis</i> self-incompatibility associated ribonuclease gene, S-RNase-S25 allele, partial cds.                           |
| AAB70517.1 | 226 | <i>Malus domestica</i> S24-RNase (S) mRNA, complete cds.                                                                            |
| BAA92438.1 | 226 | <i>Malus domestica</i> Sh mRNA for Sh-RNase, complete cds.                                                                          |
| BAO05502.1 | 68  | <i>Eriobotrya japonica</i> S-RNase gene, partial cds, allele: S11.                                                                  |

|            |     |                                                                                                                                     |
|------------|-----|-------------------------------------------------------------------------------------------------------------------------------------|
| AEI26153.1 | 65  | <i>Malus x domestica</i> cultivar Harangalma S-ribonuclease (S) gene, S24 allele, partial cds.                                      |
| AEI26154.1 | 65  | <i>Malus x domestica</i> cultivar Nemes szercsika S-ribonuclease (S) gene, S24 allele, partial cds.                                 |
| AEI26155.1 | 65  | <i>Malus x domestica</i> cultivar Nemes sovari (Brogdale) S-ribonuclease gene, S24 allele, partial cds.                             |
| BAB47144.1 | 52  | <i>Malus x domestica</i> gene for Sh-RNase, partial cds.                                                                            |
| AGF69955.1 | 64  | <i>Pyrus pyra</i> ster S-RNase (S-RNase) gene, S-RNase-S41.01 allele, partial cds.                                                  |
| AGF69957.1 | 64  | <i>Pyrus pyra</i> ster S-RNase (S-RNase) gene, S-RNase-S41.03 allele, partial cds.                                                  |
| AGF69960.1 | 64  | <i>Pyrus pyra</i> ster S-RNase (S-RNase) gene, S-RNase-S41.06 allele, partial cds.                                                  |
| AGF69962.1 | 64  | <i>Pyrus pyra</i> ster S-RNase (S-RNase) gene, S-RNase-S41.08 allele, partial cds.                                                  |
| AGF69965.1 | 64  | <i>Pyrus pyra</i> ster S-RNase (S-RNase) gene, S-RNase-S41.11 allele, partial cds.                                                  |
| AGF69966.1 | 64  | <i>Pyrus pyra</i> ster S-RNase (S-RNase) gene, S-RNase-S41.12 allele, partial cds.                                                  |
| AGF69972.1 | 64  | <i>Pyrus pyra</i> ster S-RNase (S-RNase) gene, S-RNase-S41.18 allele, partial cds.                                                  |
| BAE92267.1 | 228 | <i>Pyrus communis</i> Sa-RNase gene for Sa-RNase, complete cds.                                                                     |
| AHA43157.1 | 197 | <i>Pyrus communis</i> isolate PHS105 self-incompatibility associated ribonuclease (S-RNase) mRNA, S-RNase-S105 allele, partial cds. |
| AHA43158.1 | 197 | <i>Pyrus communis</i> isolate ES105 self-incompatibility associated ribonuclease (S-RNase) mRNA, S-RNase-S105 allele, partial cds.  |
| AHA43159.1 | 197 | <i>Pyrus communis</i> isolate SSS105 self-incompatibility associated ribonuclease (S-RNase) mRNA, S-RNase-S105 allele, partial cds. |
| ABG54496.1 | 165 | <i>Pyrus communis</i> cultivar Rocha S-RNase (S) gene, Sa allele, partial cds.                                                      |
| ABC72070.1 | 151 | <i>Pyrus communis</i> self-incompatibility associated ribonuclease (S) gene, S5 allele, partial cds.                                |
| BAE92269.1 | 228 | <i>Pyrus communis</i> Sk-RNase gene for Sk-RNase, complete cds.                                                                     |
| AHA43151.1 | 197 | <i>Pyrus communis</i> isolate BDS103 self-incompatibility associated ribonuclease (S-RNase) mRNA, S-RNase-S103 allele, partial cds. |
| AHA43152.1 | 197 | <i>Pyrus communis</i> isolate XS103 self-incompatibility associated ribonuclease (S-RNase) mRNA, S-RNase-S103 allele, partial cds.  |



|            |     |                                                                                                                                     |
|------------|-----|-------------------------------------------------------------------------------------------------------------------------------------|
| AHA43153.1 | 197 | <i>Pyrus communis</i> isolate TVS103 self-incompatibility associated ribonuclease (S-RNase) mRNA, S-RNase-S103 allele, partial cds. |
| AAM51634.1 | 179 | <i>Pyrus communis</i> S-RNase (S) gene, Sk allele, exons 1 and 2 and partial cds.                                                   |
| ABP04108.1 | 151 | <i>Pyrus communis</i> self-incompatibility associated ribonuclease (S) gene, S-3 allele, partial cds.                               |
| AAB70515.1 | 227 | <i>Malus domestica</i> S26-RNase (S) mRNA, complete cds.                                                                            |
| BAH24196.1 | 166 | <i>Malus x domestica</i> S26-RNase gene for S26-RNase, partial cds.                                                                 |
| BAJ83831.1 | 152 | <i>Malus prunifolia</i> mpS2-RNase gene for S-RNase, partial cds.                                                                   |
| AIG55251.1 | 146 | <i>Malus spectabilis</i> self-incompatibility ribonuclease (S-RNase) gene, S-RNase-S26 allele, partial cds.                         |
| ABI29897.1 | 94  | <i>Malus sieversii</i> self-incompatibility S35-RNase (S) gene, S35 allele, partial cds.                                            |
| ABZ81719.1 | 67  | <i>Malus x domestica</i> cultivar David S26-RNase (S-RNase) gene, S-RNase-S26 allele, partial cds.                                  |
| ABR23512.1 | 232 | <i>Pyrus pyrifolia</i> isolate cangxi S15-RNase gene, complete cds.                                                                 |
| AIG55244.1 | 150 | <i>Malus kansuensis</i> self-incompatibility ribonuclease (S-RNase) gene, S-RNase-S6 allele, partial cds.                           |
| ABG49101.1 | 103 | <i>Pyrus pyrifolia</i> S15-RNase gene, partial cds.                                                                                 |
| ABG67958.1 | 71  | <i>Pyrus pyrifolia</i> cultivar Cangxixueli S38-RNase (S38) gene, partial cds.                                                      |
| ACA05145.1 | 71  | <i>Malus sylvestris</i> S44-RNase gene, partial cds.                                                                                |
| BAA32415.1 | 229 | <i>Pyrus pyrifolia</i> mRNA for S6-RNase, complete cds, cultivar:Imamurasaki.                                                       |
| ACL14810.1 | 180 | <i>Pyrus syriaca</i> isolate sasa 2 S7-RNase gene, partial cds.                                                                     |
| AGF70059.1 | 65  | <i>Pyrus pyraaster</i> S-RNase (S-RNase) gene, S-RNase-S49.01 allele, partial cds.                                                  |
| AGF70060.1 | 65  | <i>Pyrus pyraaster</i> S-RNase (S-RNase) gene, S-RNase-S49.02 allele, partial cds.                                                  |
| AGF70061.1 | 65  | <i>Pyrus pyraaster</i> S-RNase (S-RNase) gene, S-RNase-S49.03 allele, partial cds.                                                  |
| AAB70516.1 | 227 | <i>Malus domestica</i> S27-RNase (S) mRNA, complete cds.                                                                            |
| AAK58853.1 | 227 | <i>Malus x domestica</i> self-incompatibility S-RNase (S) mRNA, S-27b allele, complete cds.                                         |
| BAH24193.1 | 165 | <i>Malus x domestica</i> S16a-RNase gene for S16a-RNase, partial cds.                                                               |
| BAH24194.1 | 165 | <i>Malus x domestica</i> S16b-RNase gene for S16b-RNase, partial cds.                                                               |
| BAD19043.1 | 158 | <i>Malus x domestica</i> S16c gene for S16c-RNase, partial cds.                                                                     |
| ABU92569.1 | 227 | <i>Pyrus pyrifolia</i> voucher Tan 4 S5a-RNase gene, complete cds.                                                                  |

|            |     |                                                                                                                                     |
|------------|-----|-------------------------------------------------------------------------------------------------------------------------------------|
| BAA13577.1 | 227 | <i>Pyrus serotina</i> mRNA for S5-RNase, complete cds.                                                                              |
| BAA32414.1 | 227 | <i>Pyrus pyrifolia</i> mRNA for S5-RNase, complete cds, cultivar:Hosui.                                                             |
| BAB61926.1 | 227 | <i>Pyrus pyrifolia</i> gene for S5-RNase, complete cds.                                                                             |
| ABI48529.1 | 98  | <i>Pyrus pyrifolia</i> voucher X. F. Tan 9180 (CFSTU) S5a-RNase gene, partial cds.                                                  |
| BAF35960.1 | 227 | <i>Pyrus communis</i> gene for Si-RNase, complete cds.                                                                              |
| AHA43160.1 | 196 | <i>Pyrus communis</i> isolate DGS106 self-incompatibility associated ribonuclease (S-RNase) mRNA, S-RNase-S106 allele, partial cds. |
| AAP92530.1 | 179 | <i>Pyrus communis</i> cultivar gentil S-RNase (S) gene, Si allele, exons 1 and 2 and partial cds.                                   |
| ABR08573.1 | 151 | <i>Pyrus communis</i> self-incompatibility associated ribonuclease (S) gene, S6 allele, partial cds.                                |
| AGF69914.1 | 65  | <i>Pyrus pyraaster</i> S-RNase (S-RNase) gene, S-RNase-S34.01 allele, partial cds.                                                  |
| BAF35963.1 | 227 | <i>Pyrus communis</i> gene for Sp-RNase, complete cds.                                                                              |
| AAQ98031.1 | 179 | <i>Pyrus communis</i> s-RNase (S) gene, Sp allele, partial cds.                                                                     |
| ABR08576.1 | 151 | <i>Pyrus communis</i> self-incompatibility associated ribonuclease (S) gene, S9 allele, partial cds.                                |
| AGF69918.1 | 65  | <i>Pyrus pyraaster</i> S-RNase (S-RNase) gene, S-RNase-S35.01 allele, partial cds.                                                  |
| AGF69921.1 | 65  | <i>Pyrus pyraaster</i> S-RNase (S-RNase) gene, S-RNase-S35.04 allele, partial cds.                                                  |
| BAF35962.1 | 226 | <i>Pyrus communis</i> gene for Sn-RNase, complete cds.                                                                              |
| AAN87037.1 | 179 | <i>Pyrus communis</i> sn s-RNase gene, partial cds.                                                                                 |
| ACL68356.1 | 179 | <i>Malus sylvestris</i> S50-RNase protein gene, partial cds.                                                                        |
| AGF69933.1 | 65  | <i>Pyrus pyraaster</i> S-RNase (S-RNase) gene, S-RNase-S37.02 allele, partial cds.                                                  |
| AGF69934.1 | 65  | <i>Pyrus pyraaster</i> S-RNase (S-RNase) gene, S-RNase-S37.03 allele, partial cds.                                                  |
| ABZ81714.1 | 65  | <i>Malus x domestica</i> cultivar Fuji S1-RNase (S-RNase) gene, S-RNase-S1 allele, partial cds.                                     |
| ACA05149.1 | 65  | <i>Malus sylvestris</i> S1'-RNase gene, partial cds.                                                                                |
| AEV40686.1 | 65  | <i>Malus x domestica</i> cultivar Nemes sovari S1-ribonuclease (S1) gene, partial cds.                                              |
| AEV40687.1 | 65  | <i>Malus x domestica</i> cultivar Szaszpap alma S1-ribonuclease (S1) gene, partial cds.                                             |
| AEV40688.1 | 65  | <i>Malus x domestica</i> cultivar Beregi sovari S1-ribonuclease (S1) gene, partial cds.                                             |
| AAA61821.1 | 228 | <i>Malus domestica</i> S9-RNase (S) mRNA, complete cds.                                                                             |

|            |     |                                                                                                                                      |
|------------|-----|--------------------------------------------------------------------------------------------------------------------------------------|
| BAA09447.1 | 228 | <i>Malus x domestica</i> S mRNA for Sc-RNase precursor, complete cds.                                                                |
| BAF47175.1 | 228 | <i>Malus x domestica</i> MdSFBB9-alpha, S9-RNase, MdSFBB9-beta genes, complete cds, Psi-SFBB9-alpha, Psi-SFBB9-beta pseudogenes.     |
| AAO40086.1 | 169 | <i>Malus x domestica</i> S-RNase (S) gene, S9 allele, partial cds.                                                                   |
| BAF35964.1 | 228 | <i>Pyrus communis</i> gene for Ss-RNase, complete cds.                                                                               |
| ABM91873.2 | 180 | <i>Pyrus communis</i> cultivar Beurre Alexander Lucas S-RNase (S) gene, Ss allele, partial cds.                                      |
| AHA43167.1 | 163 | <i>Pyrus communis</i> isolate BALS111 self-incompatibility associated ribonuclease (S-RNase) mRNA, S-RNase-S111 allele, partial cds. |
| ABR08578.1 | 152 | <i>Pyrus communis</i> self-incompatibility associated ribonuclease (S) gene, S11 allele, partial cds.                                |
| AAK58854.1 | 227 | <i>Malus x domestica</i> self-incompatibility S-RNase (S) mRNA, S-4 allele, complete cds.                                            |
| AIG55238.1 | 145 | <i>Malus baccata</i> self-incompatibility ribonuclease (S-RNase) gene, S-RNase-S5 allele, partial cds.                               |
| AIG55240.1 | 145 | <i>Malus kansuensis</i> self-incompatibility ribonuclease (S-RNase) gene, S-RNase-S5 allele, partial cds.                            |
| ABZ81716.1 | 66  | <i>Malus x domestica</i> cultivar Gloster S4-RNase (S-RNase) gene, S-RNase-S4 allele, partial cds.                                   |
| BAA93052.1 | 227 | <i>Pyrus pyrifolia</i> gene for S3-RNase, complete cds.                                                                              |
| BAA32413.1 | 222 | <i>Pyrus pyrifolia</i> mRNA for S3-RNase, complete cds, cultivar:Hosui.                                                              |
| AGF69953.1 | 64  | <i>Pyrus pyraaster</i> S-RNase (S-RNase) gene, S-RNase-S40.03 allele, partial cds.                                                   |
| AGF69954.1 | 64  | <i>Pyrus pyraaster</i> S-RNase (S-RNase) gene, S-RNase-S40.04 allele, partial cds.                                                   |
| ADB85478.1 | 226 | <i>Malus spectabilis</i> self-incompatibility ribonuclease S2 (S-RNase) mRNA, S-RNase-S2 allele, complete cds.                       |
| AAK72320.1 | 193 | <i>Malus x domestica</i> S29-RNase (S) gene, S29 allele, partial cds.                                                                |
| AIG55239.1 | 144 | <i>Malus hupehensis</i> self-incompatibility ribonuclease (S-RNase) gene, S-RNase-S29 allele, partial cds.                           |
| ADB85479.1 | 96  | <i>Malus spectabilis</i> self-incompatibility ribonuclease S2 (S-RNase) gene, S-RNase-S2 allele, partial cds.                        |
| BAA92372.1 | 225 | <i>Malus transitoria</i> mRNA for St-RNase, complete cds.                                                                            |
| AIG55255.1 | 143 | <i>Malus sikkimensis</i> self-incompatibility ribonuclease (S-RNase) gene, S-RNase-St allele, partial cds.                           |
| ACA05148.1 | 66  | <i>Malus sylvestris</i> S36-RNase gene, partial cds.                                                                                 |
| BAB60685.1 | 53  | <i>Malus transitoria</i> gene for St-RNase, partial cds.                                                                             |
| AGJ00807.1 | 179 | <i>Pyrus betulifolia</i> self-incompatibility associated ribonuclease (S) gene, S-1 allele, partial cds.                             |

|            |     |                                                                                                                                     |
|------------|-----|-------------------------------------------------------------------------------------------------------------------------------------|
| ABE26656.1 | 67  | <i>Pyrus communis</i> cultivar Suomei S37-RNase gene, partial cds.                                                                  |
| ACA05144.1 | 67  | <i>Malus sylvestris</i> S45-RNase gene, partial cds.                                                                                |
| AGF70010.1 | 65  | <i>Pyrus pyraister</i> S-RNase (S-RNase) gene, S-RNase-S43.02 allele, partial cds.                                                  |
| BAH24191.1 | 167 | <i>Malus x domestica</i> S5-RNase gene for S5-RNase, partial cds.                                                                   |
| AIG55246.1 | 147 | <i>Malus micromalus</i> self-incompatibility ribonuclease (S-RNase) gene, S-RNase-S8 allele, partial cds.                           |
| ABZ81720.1 | 68  | <i>Malus x domestica</i> cultivar Elstar S5-RNase (S-RNase) gene, S-RNase-S5 allele, partial cds.                                   |
| ACA05153.1 | 68  | <i>Malus sylvestris</i> S5'-RNase gene, partial cds.                                                                                |
| BAF63842.1 | 232 | <i>Pyrus pyrifolia</i> mRNA for Sk-RNase, complete cds.                                                                             |
| BAH24175.1 | 232 | <i>Pyrus pyrifolia</i> gene for Sk-RNase, complete cds, cultivar: Hogyoku.                                                          |
| BAF63843.1 | 58  | <i>Pyrus pyrifolia</i> gene for Sk-RNase, partial cds.                                                                              |
| BAF35965.1 | 229 | <i>Pyrus communis</i> gene for St-RNase, complete cds.                                                                              |
| AHA43168.1 | 198 | <i>Pyrus communis</i> isolate DGS113 self-incompatibility associated ribonuclease (S-RNase) mRNA, S-RNase-S113 allele, partial cds. |
| ABR08580.1 | 153 | <i>Pyrus communis</i> self-incompatibility associated ribonuclease (S) gene, S13 allele, partial cds.                               |
| AAA79842.1 | 228 | <i>Malus domestica</i> S3-RNase (S) mRNA, complete cds.                                                                             |
| BAH24189.1 | 166 | <i>Malus x domestica</i> S3-RNase gene for S3-RNase, partial cds.                                                                   |
| ABZ81715.1 | 67  | <i>Malus x domestica</i> cultivar Elstar S3-RNase (S-RNase) gene, S-RNase-S3 allele, partial cds.                                   |
| AAK58852.1 | 228 | <i>Malus x domestica</i> self-incompatibility S-RNase (S) mRNA, S-10 allele, complete cds.                                          |
| BAB60823.1 | 228 | <i>Malus x domestica</i> mRNA for Si-RNase, complete cds.                                                                           |
| BAH24192.1 | 166 | <i>Malus x domestica</i> S10-RNase gene for S10-RNase, partial cds.                                                                 |
| BAF35958.1 | 228 | <i>Pyrus communis</i> gene for Sc-RNase, complete cds.                                                                              |
| AHA43169.1 | 197 | <i>Pyrus communis</i> isolate NPS114 self-incompatibility associated ribonuclease (S-RNase) mRNA, S-RNase-S114 allele, partial cds. |
| ABR08581.1 | 151 | <i>Pyrus communis</i> self-incompatibility associated ribonuclease (S) gene, S14 allele, partial cds.                               |
| ADB85482.1 | 227 | <i>Malus spectabilis</i> self-incompatibility ribonuclease S4 (S-RNase) mRNA, S-RNase-S4 allele, complete cds.                      |
| ACL68358.1 | 179 | <i>Malus mandshurica</i> S52-RNase protein gene, partial cds.                                                                       |

|            |     |                                                                                                                |
|------------|-----|----------------------------------------------------------------------------------------------------------------|
| ADB85483.1 | 66  | <i>Malus spectabilis</i> self-incompatibility ribonuclease S4 (S-RNase) gene, S-RNase-S4 allele, partial cds.  |
| ADB85484.1 | 227 | <i>Malus spectabilis</i> self-incompatibility ribonuclease S5 (S-RNase) mRNA, S-RNase-S5 allele, complete cds. |
| BAJ83830.1 | 151 | <i>Malus prunifolia</i> mpS1-RNase gene for S-RNase, partial cds.                                              |
| ADB85485.1 | 97  | <i>Malus spectabilis</i> self-incompatibility ribonuclease S5 (S-RNase) gene, S-RNase-S5 allele, partial cds.  |
| ABV00515.1 | 226 | <i>Pyrus pyrifolia</i> cultivar Maogong S12-RNase gene, complete cds.                                          |
| BAH24173.1 | 226 | <i>Pyrus pyrifolia</i> mRNA for S12-RNase, complete cds, cultivar: Kuroki.                                     |
| ABD83710.1 | 65  | <i>Pyrus communis</i> cultivar Huoba S36-RNase (S) gene, partial cds.                                          |
| BAA32416.1 | 226 | <i>Pyrus pyrifolia</i> mRNA for S7-RNase, complete cds, cultivar: Okusankichi.                                 |
| AGF69932.1 | 65  | <i>Pyrus pyrastrer</i> S-RNase (S-RNase) gene, S-RNase-S37.01 allele, partial cds.                             |
| ACD62793.1 | 42  | <i>Pyrus pyrastrer</i> S-RNase (S) gene, S22_(G1-1) allele, partial cds.                                       |
| BAA76620.1 | 226 | <i>Malus domestica</i> mRNA for Sg-RNase, complete cds.                                                        |
| ABZ81718.1 | 65  | <i>Malus x domestica</i> cultivar Indo S20-RNase (S-RNase) gene, S-RNase-S20 allele, partial cds.              |
| AEV40696.1 | 65  | <i>Malus x domestica</i> cultivar Nemes sovari (Visk) S20-ribonuclease gene, partial cds.                      |
| BAA77693.1 | 226 | <i>Pyrus pyrifolia</i> gene for S2-RNase, complete cds.                                                        |
| BAJ52233.1 | 226 | <i>Pyrus pyrifolia</i> genes for F-box proteins and S2-RNase, complete cds, haplotype: S2.                     |
| BAA08473.1 | 221 | <i>Pyrus pyrifolia</i> mRNA for ribonuclease, complete cds.                                                    |
| ACA42892.1 | 191 | <i>Malus x domestica</i> S-RNase (S) gene, S-kb allele, partial cds.                                           |
| ACI03591.1 | 178 | <i>Malus x domestica</i> S44-RNase protein gene, partial cds.                                                  |
| ABW34931.1 | 81  | <i>Malus x domestica</i> S-RNase (S) mRNA, S-kb allele, partial cds.                                           |
| ACL14812.1 | 179 | <i>Pyrus syriaca</i> isolate manara 12 S8-RNase gene, partial cds.                                             |
| ADC92282.1 | 175 | <i>Eriobotrya japonica</i> S2-RNase gene, partial cds.                                                         |
| ACC66150.1 | 151 | <i>Eriobotrya japonica</i> self-incompatibility associated ribonuclease gene, S2 allele, partial cds.          |
| ACI03589.1 | 177 | <i>Malus x domestica</i> S45-RNase protein gene, partial cds.                                                  |
| ACM48195.1 | 177 | <i>Malus x domestica</i> S54-RNase protein gene, partial cds.                                                  |
| ACA05143.1 | 65  | <i>Malus sylvestris</i> S46-RNase gene, partial cds.                                                           |
| ACL14814.1 | 177 | <i>Pyrus syriaca</i> isolate manara 600 S10-RNase gene, partial cds.                                           |

|            |     |                                                                                                                |
|------------|-----|----------------------------------------------------------------------------------------------------------------|
| ADC92283.1 | 157 | <i>Eriobotrya japonica</i> S3-RNase gene, partial cds.                                                         |
| ACC66151.1 | 149 | <i>Eriobotrya japonica</i> self-incompatibility associated ribonuclease gene, S3 allele, partial cds.          |
| AGF70034.1 | 65  | <i>Pyrus pyraaster</i> S-RNase (S-RNase) gene, S-RNase-S47.06 allele, partial cds.                             |
| AGF70035.1 | 65  | <i>Pyrus pyraaster</i> S-RNase (S-RNase) gene, S-RNase-S47.07 allele, partial cds.                             |
| AGF70036.1 | 65  | <i>Pyrus pyraaster</i> S-RNase (S-RNase) gene, S-RNase-S47.08 allele, partial cds.                             |
| ACS94938.4 | 236 | <i>Eriobotrya japonica</i> S6 RNase gene, complete cds.                                                        |
| ACC66152.1 | 151 | <i>Eriobotrya japonica</i> self-incompatibility associated ribonuclease gene, S5 allele, partial cds.          |
| BAJ10662.1 | 232 | <i>Malus sieversii</i> S33-RNase gene for S33-RNase (Ssi5-RNase), complete cds.                                |
| AIG55241.1 | 150 | <i>Malus kansuensis</i> self-incompatibility ribonuclease (S-RNase) gene, S-RNase-S33 allele, partial cds.     |
| BAA32412.1 | 228 | <i>Pyrus pyrifolia</i> mRNA for S1-RNase, complete cds, cultivar:Imamuraaki.                                   |
| ABF59105.1 | 66  | <i>Pyrus pyrifolia</i> S1-RNase gene, partial cds.                                                             |
| BAB72163.1 | 228 | <i>Malus x domestica</i> mRNA for Sz-RNase, complete cds.                                                      |
| BAH24195.1 | 166 | <i>Malus x domestica</i> S25-RNase gene for S25-RNase, partial cds.                                            |
| BAE92261.2 | 228 | <i>Pyrus communis</i> Sq-RNase gene for Sq-RNase, complete cds.                                                |
| ABR08579.1 | 151 | <i>Pyrus communis</i> self-incompatibility associated ribonuclease (S) gene, S12 allele, partial cds.          |
| BAF35959.1 | 228 | <i>Pyrus communis</i> gene for Sg-RNase, complete cds.                                                         |
| ABR08577.1 | 151 | <i>Pyrus communis</i> self-incompatibility associated ribonuclease (S) gene, S10 allele, partial cds.          |
| ADB85476.1 | 227 | <i>Malus spectabilis</i> self-incompatibility ribonuclease S1 (S-RNase) mRNA, S-RNase-S1 allele, complete cds. |
| ADB85477.1 | 98  | <i>Malus spectabilis</i> self-incompatibility ribonuclease S1 (S-RNase) gene, S-RNase-S1 allele, partial cds.  |
| BAA09448.1 | 226 | <i>Malus x domestica</i> S mRNA for Sf-RNase precursor, complete cds.                                          |
| AIG55253.1 | 143 | <i>Malus micromalus</i> self-incompatibility ribonuclease (S-RNase) gene, S-RNase-Sf allele, partial cds.      |
| BAC24106.1 | 226 | <i>Malus transitoria</i> Sg' mRNA for Sg'-RNase, complete cds.                                                 |
| AIG55254.1 | 143 | <i>Malus rockii</i> self-incompatibility ribonuclease (S-RNase) gene, S-RNase-Sg allele, partial cds.          |
| ABP01654.1 | 189 | <i>Sorbus aucuparia</i> isolate SaucS6 self-incompatibility RNase mRNA, partial cds.                           |
| AAM28162.1 | 151 | <i>Sorbus aucuparia</i> isolate SaucS6 putative self-incompatibility protein mRNA, partial cds.                |
| ABP01658.1 | 188 | <i>Sorbus aucuparia</i> isolate SaucS18 self-incompatibility RNase mRNA, partial cds.                          |

|            |     |                                                                                                           |
|------------|-----|-----------------------------------------------------------------------------------------------------------|
| ABO64444.1 | 149 | <i>Sorbus aucuparia</i> self-incompatibility RNase (S-RNase) gene, S-RNase-Sauc18 allele, partial cds.    |
| ABP01659.1 | 188 | <i>Sorbus aucuparia</i> isolate SaucS19 self-incompatibility RNase mRNA, partial cds.                     |
| AAM28175.1 | 148 | <i>Sorbus aucuparia</i> isolate SaucS19 putative self-incompatibility protein mRNA, partial cds.          |
| ABY87317.1 | 179 | <i>Pyrus syriaca</i> S6 RNase gene, partial cds.                                                          |
| ABP64698.1 | 65  | <i>Pyrus betulifolia</i> S19-RNase gene, partial cds.                                                     |
| AGJ00808.1 | 179 | <i>Pyrus betulifolia</i> self-incompatibility associated ribonuclease (S) gene, S-2 allele, partial cds.  |
| ABJ52519.1 | 67  | <i>Pyrus ussuriensis</i> S-RNase (S-RNase) gene, S-RNase-S41 allele, partial cds.                         |
| ACI03588.1 | 178 | <i>Malus x domestica</i> S21-RNase protein gene, partial cds.                                             |
| BAC75875.1 | 53  | <i>Malus x domestica</i> gene for S21-RNase, partial cds, cultivar:Ribston Pippin.                        |
| ADC92284.1 | 178 | <i>Eriobotrya japonica</i> S4-RNase gene, partial cds.                                                    |
| ACC66153.1 | 150 | <i>Eriobotrya japonica</i> self-incompatibility associated ribonuclease gene, S4 allele, partial cds.     |
| ABP01652.1 | 154 | <i>Sorbus aucuparia</i> isolate SaucS3 self-incompatibility RNase mRNA, partial cds.                      |
| AAM28159.1 | 150 | <i>Sorbus aucuparia</i> isolate SaucS3 putative self-incompatibility protein mRNA, partial cds.           |
| AAM28160.1 | 150 | <i>Sorbus aucuparia</i> isolate SaucS4 putative self-incompatibility protein mRNA, partial cds.           |
| ABO64443.1 | 150 | <i>Sorbus aucuparia</i> self-incompatibility RNase (S-RNase) gene, S-RNase-Sauc4 allele, partial cds.     |
| ABI34571.1 | 112 | <i>Pyrus communis</i> cultivar Tosca S-RNase (S) gene, S1 allele, partial cds.                            |
| ABI47926.1 | 112 | <i>Pyrus communis</i> cultivar Williams S-RNase (S) gene, S1 allele, partial cds.                         |
| BAO05500.1 | 70  | <i>Eriobotrya japonica</i> S-RNase gene, partial cds, allele: S9.                                         |
| AGG56594.1 | 53  | <i>Eriobotrya japonica</i> self-incompatibility associated ribonuclease gene, S18 allele, partial cds.    |
| ABZ81721.1 | 67  | <i>Malus x domestica</i> cultivar Citron d'Hiver S6-RNase (S-RNase) gene, S-RNase-S6 allele, partial cds. |
| BAC75876.1 | 54  | <i>Malus x domestica</i> gene for S6-RNase, partial cds, cultivar:Oetwiler Reinette.                      |
| AEI26157.1 | 67  | <i>Malus x domestica</i> cultivar Szabadkai szercsika S-ribonuclease (S) gene, S26 allele, partial cds.   |
| AEI26158.1 | 67  | <i>Malus x domestica</i> cultivar Szaszpap alma S-ribonuclease (S) gene, S26 allele, partial cds.         |
| AGF70021.1 | 67  | <i>Pyrus pyraaster</i> S-RNase (S-RNase) gene, S-RNase-S44.06 allele, partial cds.                        |
| AGF70026.1 | 67  | <i>Pyrus pyraaster</i> S-RNase (S-RNase) gene, S-RNase-S44.11 allele, partial cds.                        |
| AEV40694.1 | 65  | <i>Malus x domestica</i> cultivar Sikulai S20-ribonuclease (S20) gene, partial cds.                       |

|            |     |                                                                                                           |
|------------|-----|-----------------------------------------------------------------------------------------------------------|
| AEV40695.1 | 65  | <i>Malus x domestica</i> cultivar Simonffy piros S20-ribonuclease (S20) gene, partial cds.                |
| AGF69903.1 | 65  | <i>Pyrus pyraaster</i> S-RNase (S-RNase) gene, S-RNase-S32.20 allele, partial cds.                        |
| AGF69904.1 | 65  | <i>Pyrus pyraaster</i> S-RNase (S-RNase) gene, S-RNase-S32.21 allele, partial cds.                        |
| AGF69923.1 | 65  | <i>Pyrus pyraaster</i> S-RNase (S-RNase) gene, S-RNase-S36.02 allele, partial cds.                        |
| AGF69926.1 | 65  | <i>Pyrus pyraaster</i> S-RNase (S-RNase) gene, S-RNase-S36.05 allele, partial cds.                        |
| AGF69975.1 | 65  | <i>Pyrus pyraaster</i> S-RNase (S-RNase) gene, S-RNase-S42.03 allele, partial cds.                        |
| AGF69986.1 | 65  | <i>Pyrus pyraaster</i> S-RNase (S-RNase) gene, S-RNase-S42.14 allele, partial cds.                        |
| AGF69993.1 | 65  | <i>Pyrus pyraaster</i> S-RNase (S-RNase) gene, S-RNase-S42.21 allele, partial cds.                        |
| AGF70001.1 | 65  | <i>Pyrus pyraaster</i> S-RNase (S-RNase) gene, S-RNase-S42.29 allele, partial cds.                        |
| AGF69995.1 | 65  | <i>Pyrus pyraaster</i> S-RNase (S-RNase) gene, S-RNase-S42.23 allele, partial cds.                        |
| AGF69999.1 | 65  | <i>Pyrus pyraaster</i> S-RNase (S-RNase) gene, S-RNase-S42.27 allele, partial cds.                        |
| AGF70029.1 | 65  | <i>Pyrus pyraaster</i> S-RNase (S-RNase) gene, S-RNase-S47.01 allele, partial cds.                        |
| AGF70030.1 | 65  | <i>Pyrus pyraaster</i> S-RNase (S-RNase) gene, S-RNase-S47.02 allele, partial cds.                        |
| ADB91384.1 | 240 | <i>Pyrus pyrifolia</i> isolate Huiyang Hongli S-locus S-RNase S46 gene, S-RNase-S21 allele, complete cds. |
| BAJ10663.1 | 232 | <i>Malus x domestica</i> S34-RNase gene for S34-RNase (Sad5-RNase), complete cds.                         |
| AAA79841.1 | 228 | <i>Malus domestica</i> S2-RNase (S) mRNA, complete cds.                                                   |
| AAZ66080.1 | 228 | <i>Malus x domestica</i> S32-RNase (S) gene, S32 allele, complete cds.                                    |
| ABY55860.1 | 228 | <i>Pyrus ussuriensis</i> S32-RNase gene, complete cds.                                                    |
| BAC84996.1 | 228 | <i>Pyrus pyrifolia</i> mRNA for S9-RNase, complete cds.                                                   |
| ABG49099.1 | 227 | <i>Pyrus pyrifolia</i> S13-RNase gene, complete cds.                                                      |
| AAZ66079.1 | 226 | <i>Malus x domestica</i> S31-RNase (S) gene, S31 allele, complete cds.                                    |
| ABS29437.1 | 226 | <i>Pyrus ussuriensis</i> S42-RNase (S) gene, complete cds.                                                |
| ABR23525.1 | 211 | <i>Pyrus pyrifolia</i> isolate zhenghe S43-RNase gene, partial cds.                                       |
| AAU93688.1 | 201 | <i>Malus x domestica</i> S8-RNase mRNA, partial cds.                                                      |
| ABP01662.1 | 191 | <i>Sorbus aucuparia</i> isolate SaucS23 self-incompatibility RNase mRNA, partial cds.                     |
| ABP01663.1 | 191 | <i>Sorbus aucuparia</i> isolate SaucS24 self-incompatibility RNase mRNA, partial cds.                     |



|            |     |                                                                                                        |
|------------|-----|--------------------------------------------------------------------------------------------------------|
| ABP01661.1 | 189 | <i>Sorbus aucuparia</i> isolate SaucS22 self-incompatibility RNase mRNA, partial cds.                  |
| ABP01651.1 | 188 | <i>Sorbus aucuparia</i> isolate SaucS2 self-incompatibility RNase mRNA, partial cds.                   |
| ABP01660.1 | 188 | <i>Sorbus aucuparia</i> isolate SaucS21 self-incompatibility RNase mRNA, partial cds.                  |
| ABP01667.1 | 188 | <i>Sorbus aucuparia</i> isolate SaucS28 self-incompatibility RNase mRNA, partial cds.                  |
| ABP01655.1 | 187 | <i>Sorbus aucuparia</i> isolate SaucS7b self-incompatibility RNase mRNA, partial cds.                  |
| ABP01666.1 | 187 | <i>Sorbus aucuparia</i> isolate SaucS27 self-incompatibility RNase mRNA, partial cds.                  |
| ABP01665.1 | 186 | <i>Sorbus aucuparia</i> isolate SaucS26 self-incompatibility RNase mRNA, partial cds.                  |
| ABP01657.1 | 184 | <i>Sorbus aucuparia</i> isolate SaucS15 self-incompatibility RNase mRNA, partial cds.                  |
| ABP01664.1 | 184 | <i>Sorbus aucuparia</i> isolate SaucS25 self-incompatibility RNase mRNA, partial cds.                  |
| ABP01656.1 | 183 | <i>Sorbus aucuparia</i> isolate SaucS13 self-incompatibility RNase mRNA, partial cds.                  |
| ABY87314.1 | 183 | <i>Pyrus syriaca</i> S4 RNase gene, partial cds.                                                       |
| ABY87316.1 | 183 | <i>Pyrus syriaca</i> S5 RNase gene, partial cds.                                                       |
| ABP01669.1 | 180 | <i>Sorbus aucuparia</i> isolate SaucS30 self-incompatibility RNase mRNA, partial cds.                  |
| ACL14811.1 | 180 | <i>Pyrus betulifolia</i> isolate havat matahim 1 S7a-RNase gene, partial cds.                          |
| AAA61819.1 | 179 | <i>Malus domestica</i> S5-RNase (S) mRNA, partial cds.                                                 |
| AAP86643.1 | 179 | <i>Pyrus communis</i> self-incompatibility ribonuclease (S) gene, So allele, partial cds.              |
| AAP92529.2 | 179 | <i>Pyrus communis</i> cultivar Spadona S-RNase (S) gene, Sj allele, exons 1 and 2 and partial cds.     |
| ABY87312.1 | 179 | <i>Pyrus syriaca</i> S1 RNase gene, partial cds.                                                       |
| ABY87313.1 | 179 | <i>Pyrus syriaca</i> S2 RNase gene, partial cds.                                                       |
| ACI03590.1 | 179 | <i>Malus x domestica</i> S46-RNase protein gene, partial cds.                                          |
| ACL68355.1 | 179 | <i>Malus sieversii</i> S49-RNase protein gene, partial cds.                                            |
| ACL68354.1 | 178 | <i>Malus angustifolia</i> S48-RNase protein gene, partial cds.                                         |
| AGG56597.1 | 171 | <i>Eriobotrya japonica</i> self-incompatibility associated ribonuclease gene, S13 allele, partial cds. |
| AFU60516.1 | 168 | <i>Eriobotrya japonica</i> S2-RNase gene, partial cds.                                                 |
| AGG56593.1 | 165 | <i>Eriobotrya japonica</i> self-incompatibility associated ribonuclease gene, S31 allele, partial cds. |
| ABP01653.1 | 161 | <i>Sorbus aucuparia</i> isolate SaucS4 self-incompatibility RNase mRNA, partial cds.                   |

|            |     |                                                                                                           |
|------------|-----|-----------------------------------------------------------------------------------------------------------|
| AGG56596.1 | 160 | <i>Eriobotrya japonica</i> self-incompatibility associated ribonuclease gene, S12 allele, partial cds.    |
| BAH24190.1 | 157 | <i>Malus x domestica</i> S4-RNase gene for S4-RNase, partial cds.                                         |
| AGG56595.1 | 153 | <i>Eriobotrya japonica</i> self-incompatibility associated ribonuclease gene, S16 allele, partial cds.    |
| AAK15072.1 | 152 | <i>Malus x domestica</i> S10-RNase (S10-RNase) gene, partial cds.                                         |
| ABW90996.1 | 151 | <i>Pyrus communis</i> self-incompatibility associated ribonuclease gene, S-RNase-S24 allele, partial cds. |
| ACC66149.1 | 151 | <i>Eriobotrya japonica</i> self-incompatibility associated ribonuclease gene, S1 allele, partial cds.     |
| AAM28168.1 | 151 | <i>Sorbus aucuparia</i> isolate SaucS12 putative self-incompatibility protein mRNA, partial cds.          |
| AHA90951.1 | 151 | <i>Pyrus communis</i> self-incompatibility ribonuclease (S-RNase) gene, S-RNase-S127 allele, partial cds. |
| ABP01668.1 | 150 | <i>Sorbus aucuparia</i> isolate SaucS29 self-incompatibility RNase mRNA, partial cds.                     |
| AAM28157.1 | 150 | <i>Sorbus aucuparia</i> isolate SaucS1 putative self-incompatibility protein mRNA, partial cds.           |
| AAM28158.1 | 150 | <i>Sorbus aucuparia</i> isolate SaucS2 putative self-incompatibility protein mRNA, partial cds.           |
| AAM28161.1 | 150 | <i>Sorbus aucuparia</i> isolate SaucS5 putative self-incompatibility protein mRNA, partial cds.           |
| AAM28163.1 | 150 | <i>Sorbus aucuparia</i> isolate SaucS7 putative self-incompatibility protein mRNA, partial cds.           |
| AAM28165.1 | 150 | <i>Sorbus aucuparia</i> isolate SaucS9 putative self-incompatibility protein mRNA, partial cds.           |
| AAM28167.1 | 150 | <i>Sorbus aucuparia</i> isolate SaucS11 putative self-incompatibility protein mRNA, partial cds.          |
| AAM28177.1 | 150 | <i>Crataegus monogyna</i> isolate CmonS1 putative self-incompatibility protein mRNA, partial cds.         |
| AAM28181.1 | 150 | <i>Crataegus monogyna</i> isolate CmonS5 putative self-incompatibility protein mRNA, partial cds.         |
| AAM28182.1 | 150 | <i>Crataegus monogyna</i> isolate CmonS6 putative self-incompatibility protein mRNA, partial cds.         |
| AAM28183.1 | 150 | <i>Crataegus monogyna</i> isolate CmonS7 putative self-incompatibility protein mRNA, partial cds.         |
| AAM28184.1 | 150 | <i>Crataegus monogyna</i> isolate CmonS8 putative self-incompatibility protein mRNA, partial cds.         |
| AHA90952.1 | 150 | <i>Pyrus communis</i> self-incompatibility ribonuclease (S-RNase) gene, S-RNase-S128 allele, partial cds. |
| AAM28169.1 | 149 | <i>Sorbus aucuparia</i> isolate SaucS13 putative self-incompatibility protein mRNA, partial cds.          |
| AAM28171.1 | 149 | <i>Sorbus aucuparia</i> isolate SaucS15 putative self-incompatibility protein mRNA, partial cds.          |
| AAM28174.1 | 149 | <i>Sorbus aucuparia</i> isolate SaucS18 putative self-incompatibility protein mRNA, partial cds.          |
| AAM28178.1 | 149 | <i>Crataegus monogyna</i> isolate CmonS2 putative self-incompatibility protein mRNA, partial cds.         |
| AAM28187.1 | 149 | <i>Crataegus monogyna</i> isolate CmonS11 putative self-incompatibility protein mRNA, partial cds.        |

|            |     |                                                                                                             |
|------------|-----|-------------------------------------------------------------------------------------------------------------|
| AAM28193.1 | 149 | <i>Crataegus monogyna</i> isolate CmonS17 putative self-incompatibility protein mRNA, partial cds.          |
| ABW90992.1 | 148 | <i>Pyrus communis</i> self-incompatibility associated ribonuclease gene, S-RNase-S20 allele, partial cds.   |
| AAM28170.1 | 148 | <i>Sorbus aucuparia</i> isolate SaucS14 putative self-incompatibility protein mRNA, partial cds.            |
| AGG56592.1 | 148 | <i>Eriobotrya japonica</i> self-incompatibility associated ribonuclease gene, S6 allele, partial cds.       |
| AAM28172.1 | 146 | <i>Sorbus aucuparia</i> isolate SaucS16 putative self-incompatibility protein mRNA, partial cds.            |
| AAM28173.1 | 146 | <i>Sorbus aucuparia</i> isolate SaucS17 putative self-incompatibility protein mRNA, partial cds.            |
| AAM28188.1 | 146 | <i>Crataegus monogyna</i> isolate CmonS12 putative self-incompatibility protein mRNA, partial cds.          |
| AAM28191.1 | 146 | <i>Crataegus monogyna</i> isolate CmonS15 putative self-incompatibility protein mRNA, partial cds.          |
| AIG55247.1 | 146 | <i>Malus rockii</i> self-incompatibility ribonuclease (S-RNase) gene, S-RNase-S9 allele, partial cds.       |
| AIG55250.1 | 146 | <i>Malus spectabilis</i> self-incompatibility ribonuclease (S-RNase) gene, S-RNase-S12 allele, partial cds. |
| AFE88174.1 | 144 | <i>Eriobotrya japonica</i> self-incompatibility associated ribonuclease gene, S-S5 allele, partial cds.     |
| AFH77149.1 | 144 | <i>Eriobotrya japonica</i> self-incompatibility associated ribonuclease gene, partial cds.                  |
| AIG55248.1 | 144 | <i>Malus spectabilis</i> self-incompatibility ribonuclease (S-RNase) gene, S-RNase-S10 allele, partial cds. |
| AAM28166.1 | 143 | <i>Sorbus aucuparia</i> isolate SaucS10 putative self-incompatibility protein mRNA, partial cds.            |
| AAM28185.1 | 140 | <i>Crataegus monogyna</i> isolate CmonS9 putative self-incompatibility protein mRNA, partial cds.           |
| AAM28164.1 | 139 | <i>Sorbus aucuparia</i> isolate SaucS8 putative self-incompatibility protein mRNA, partial cds.             |
| AAM28179.1 | 139 | <i>Crataegus monogyna</i> isolate CmonS3 putative self-incompatibility protein mRNA, partial cds.           |
| AAM28180.1 | 139 | <i>Crataegus monogyna</i> isolate CmonS4 putative self-incompatibility protein mRNA, partial cds.           |
| AAM28186.1 | 139 | <i>Crataegus monogyna</i> isolate CmonS10 putative self-incompatibility protein mRNA, partial cds.          |
| AAM28189.1 | 139 | <i>Crataegus monogyna</i> isolate CmonS13 putative self-incompatibility protein mRNA, partial cds.          |
| AAM28190.1 | 138 | <i>Crataegus monogyna</i> isolate CmonS14 putative self-incompatibility protein mRNA, partial cds.          |
| AAM28194.1 | 138 | <i>Crataegus monogyna</i> isolate CmonS18 putative self-incompatibility protein mRNA, partial cds.          |
| AIG55256.1 | 118 | <i>Malus toringoides</i> self-incompatibility ribonuclease (S-RNase) gene, S-RNase-Sa allele, partial cds.  |
| ABI47920.1 | 115 | <i>Pyrus communis</i> cultivar Clapp's Rouge S-RNase (S) gene, Se allele, partial cds.                      |
| ABI47923.1 | 112 | <i>Pyrus communis</i> cultivar General Leclerc S-RNase (S) gene, Sl allele, partial cds.                    |
| ABI47917.1 | 111 | <i>Pyrus communis</i> cultivar Alexandrine Douillard S-RNase (S) gene, Sk allele, partial cds.              |

|            |     |                                                                                                           |
|------------|-----|-----------------------------------------------------------------------------------------------------------|
| ABI47922.1 | 111 | <i>Pyrus communis</i> cultivar General Leclerc S-RNase (S) gene, Sq allele, partial cds.                  |
| ABI47925.1 | 111 | <i>Pyrus communis</i> cultivar Beurre Precoce Morettini S-RNase (S) gene, Sk allele, partial cds.         |
| ABI47929.1 | 111 | <i>Pyrus communis</i> cultivar Beurre Clairgeau S-RNase (S) gene, Sa allele, partial cds.                 |
| ABI47930.1 | 111 | <i>Pyrus communis</i> cultivar Beurre d'Avril S-RNase (S) gene, St allele, partial cds.                   |
| ABI47934.1 | 111 | <i>Pyrus communis</i> cultivar Perola S-RNase (S) gene, Sk allele, partial cds.                           |
| AAM28192.1 | 110 | <i>Crataegus monogyna</i> isolate CmonS16 putative self-incompatibility protein mRNA, partial cds.        |
| CAD30838.1 | 110 | <i>Pyrus communis</i> partial RNase gene for RNase protein, exons 1 and 2, allele h.                      |
| ABI47928.1 | 109 | <i>Pyrus communis</i> cultivar Tosca S-RNase (S) gene, Sb allele, partial cds.                            |
| ABB51160.1 | 99  | <i>Pyrus pyrifolia</i> S34-RNase gene, partial cds.                                                       |
| ABG36710.1 | 91  | <i>Malus sieversii</i> self-incompatibility RNase S34 gene, partial cds.                                  |
| AAM28176.1 | 81  | <i>Sorbus aucuparia</i> isolate SaucS20 putative self-incompatibility protein mRNA, partial cds.          |
| CAD30836.1 | 75  | <i>Pyrus communis</i> partial RNase gene for RNase protein, exons 1 and 2, allele c.                      |
| AAN76354.1 | 71  | <i>Pyrus pyrifolia</i> S10-RNase gene, partial cds.                                                       |
| ABZ81712.1 | 71  | <i>Malus x domestica</i> cultivar Ingrid Marie S43-RNase (S-RNase) gene, S-RNase-S43 allele, partial cds. |
| ABZ81713.1 | 71  | <i>Malus x domestica</i> cultivar Murray S42-RNase (S-RNase) gene, S-RNase-S42 allele, partial cds.       |
| ACA05155.1 | 71  | <i>Malus sylvestris</i> S41-RNase mRNA, partial cds.                                                      |
| BAO05498.1 | 70  | <i>Eriobotrya japonica</i> S-RNase gene, partial cds, allele: S7.                                         |
| BAO05499.1 | 70  | <i>Eriobotrya japonica</i> S-RNase gene, partial cds, allele: S8.                                         |
| ABG67959.1 | 68  | <i>Pyrus pyrifolia</i> cultivar Guanyangxueli S39-RNase (S39) gene, partial cds.                          |
| ACA05154.1 | 68  | <i>Malus sylvestris</i> S39-RNase gene, partial cds.                                                      |
| ABA91044.1 | 67  | <i>Malus x domestica</i> S33-RNase gene, partial cds.                                                     |
| ACA05142.1 | 67  | <i>Malus sylvestris</i> S47-RNase gene, partial cds.                                                      |
| ACA05146.1 | 67  | <i>Malus sylvestris</i> S38-RNase gene, partial cds.                                                      |
| ACA05147.1 | 67  | <i>Malus sylvestris</i> S37-RNase gene, partial cds.                                                      |
| ACA05150.1 | 67  | <i>Malus sylvestris</i> S23'-RNase gene, partial cds.                                                     |
| ACA05151.1 | 67  | <i>Malus sylvestris</i> S9'-RNase gene, partial cds.                                                      |

|            |    |                                                                                                  |
|------------|----|--------------------------------------------------------------------------------------------------|
| ADE19013.1 | 67 | <i>Malus sieversii</i> S-RNase (S) gene, S9" allele, partial cds.                                |
| ADE19014.1 | 67 | <i>Malus sieversii</i> S-RNase (S) gene, S48 allele, partial cds.                                |
| AEI26162.1 | 67 | <i>Malus x domestica</i> cultivar Tordai alma S-ribonuclease (S) gene, S2 allele, partial cds.   |
| AGF70018.1 | 67 | <i>Pyrus pyraaster</i> S-RNase (S-RNase) gene, S-RNase-S44.03 allele, partial cds.               |
| AGF70019.1 | 67 | <i>Pyrus pyraaster</i> S-RNase (S-RNase) gene, S-RNase-S44.04 allele, partial cds.               |
| AGF70020.1 | 67 | <i>Pyrus pyraaster</i> S-RNase (S-RNase) gene, S-RNase-S44.05 allele, partial cds.               |
| AGF70022.1 | 67 | <i>Pyrus pyraaster</i> S-RNase (S-RNase) gene, S-RNase-S44.07 allele, partial cds.               |
| AGF70023.1 | 67 | <i>Pyrus pyraaster</i> S-RNase (S-RNase) gene, S-RNase-S44.08 allele, partial cds.               |
| AGF70024.1 | 67 | <i>Pyrus pyraaster</i> S-RNase (S-RNase) gene, S-RNase-S44.09 allele, partial cds.               |
| ABR23524.1 | 66 | <i>Pyrus pyrifolia</i> isolate huoba S44-RNase gene, partial cds.                                |
| ACA05152.1 | 66 | <i>Malus sylvestris</i> S40-RNase gene, partial cds.                                             |
| AEV40689.1 | 66 | <i>Malus x domestica</i> cultivar Marosszeki piros S4-RNase protein (S4) gene, partial cds.      |
| ABG49100.1 | 65 | <i>Pyrus pyrifolia</i> S12-RNase gene, partial cds.                                              |
| AEI26152.1 | 65 | <i>Malus x domestica</i> cultivar Vilmos renet S-ribonuclease (S) gene, S24 allele, partial cds. |
| AEV40685.1 | 65 | <i>Malus x domestica</i> cultivar Citromalma S1-ribonuclease (S1) gene, partial cds.             |
| AGF69886.1 | 65 | <i>Pyrus pyraaster</i> S-RNase (S-RNase) gene, S-RNase-S32.03 allele, partial cds.               |
| AGF69887.1 | 65 | <i>Pyrus pyraaster</i> S-RNase (S-RNase) gene, S-RNase-S32.04 allele, partial cds.               |
| AGF69888.1 | 65 | <i>Pyrus pyraaster</i> S-RNase (S-RNase) gene, S-RNase-S32.05 allele, partial cds.               |
| AGF69891.1 | 65 | <i>Pyrus pyraaster</i> S-RNase (S-RNase) gene, S-RNase-S32.08 allele, partial cds.               |
| AGF69893.1 | 65 | <i>Pyrus pyraaster</i> S-RNase (S-RNase) gene, S-RNase-S32.10 allele, partial cds.               |
| AGF69894.1 | 65 | <i>Pyrus pyraaster</i> S-RNase (S-RNase) gene, S-RNase-S32.11 allele, partial cds.               |
| AGF69896.1 | 65 | <i>Pyrus pyraaster</i> S-RNase (S-RNase) gene, S-RNase-S32.13 allele, partial cds.               |
| AGF69897.1 | 65 | <i>Pyrus pyraaster</i> S-RNase (S-RNase) gene, S-RNase-S32.14 allele, partial cds.               |
| AGF69905.1 | 65 | <i>Pyrus pyraaster</i> S-RNase (S-RNase) gene, S-RNase-S32.22 allele, partial cds.               |
| AGF69906.1 | 65 | <i>Pyrus pyraaster</i> S-RNase (S-RNase) gene, S-RNase-S32.23 allele, partial cds.               |
| AGF69907.1 | 65 | <i>Pyrus pyraaster</i> S-RNase (S-RNase) gene, S-RNase-S32.24 allele, partial cds.               |

|            |    |                                                                             |
|------------|----|-----------------------------------------------------------------------------|
| AGF69908.1 | 65 | Pyrus pyraaster S-RNase (S-RNase) gene, S-RNase-S32.26 allele, partial cds. |
| AGF69909.1 | 65 | Pyrus pyraaster S-RNase (S-RNase) gene, S-RNase-S32.27 allele, partial cds. |
| AGF69910.1 | 65 | Pyrus pyraaster S-RNase (S-RNase) gene, S-RNase-S32.28 allele, partial cds. |
| AGF69915.1 | 65 | Pyrus pyraaster S-RNase (S-RNase) gene, S-RNase-S34.02 allele, partial cds. |
| AGF69916.1 | 65 | Pyrus pyraaster S-RNase (S-RNase) gene, S-RNase-S34.03 allele, partial cds. |
| AGF69917.1 | 65 | Pyrus pyraaster S-RNase (S-RNase) gene, S-RNase-S34.04 allele, partial cds. |
| AGF69919.1 | 65 | Pyrus pyraaster S-RNase (S-RNase) gene, S-RNase-S35.02 allele, partial cds. |
| AGF69920.1 | 65 | Pyrus pyraaster S-RNase (S-RNase) gene, S-RNase-S35.03 allele, partial cds. |
| AGF69924.1 | 65 | Pyrus pyraaster S-RNase (S-RNase) gene, S-RNase-S36.03 allele, partial cds. |
| AGF69927.1 | 65 | Pyrus pyraaster S-RNase (S-RNase) gene, S-RNase-S36.06 allele, partial cds. |
| AGF69935.1 | 65 | Pyrus pyraaster S-RNase (S-RNase) gene, S-RNase-S38.01 allele, partial cds. |
| AGF69974.1 | 65 | Pyrus pyraaster S-RNase (S-RNase) gene, S-RNase-S42.02 allele, partial cds. |
| AGF69977.1 | 65 | Pyrus pyraaster S-RNase (S-RNase) gene, S-RNase-S42.05 allele, partial cds. |
| AGF69979.1 | 65 | Pyrus pyraaster S-RNase (S-RNase) gene, S-RNase-S42.07 allele, partial cds. |
| AGF69980.1 | 65 | Pyrus pyraaster S-RNase (S-RNase) gene, S-RNase-S42.08 allele, partial cds. |
| AGF69982.1 | 65 | Pyrus pyraaster S-RNase (S-RNase) gene, S-RNase-S42.10 allele, partial cds. |
| AGF69983.1 | 65 | Pyrus pyraaster S-RNase (S-RNase) gene, S-RNase-S42.11 allele, partial cds. |
| AGF69991.1 | 65 | Pyrus pyraaster S-RNase (S-RNase) gene, S-RNase-S42.19 allele, partial cds. |
| AGF69992.1 | 65 | Pyrus pyraaster S-RNase (S-RNase) gene, S-RNase-S42.20 allele, partial cds. |
| AGF69994.1 | 65 | Pyrus pyraaster S-RNase (S-RNase) gene, S-RNase-S42.22 allele, partial cds. |
| AGF69996.1 | 65 | Pyrus pyraaster S-RNase (S-RNase) gene, S-RNase-S42.24 allele, partial cds. |
| AGF69997.1 | 65 | Pyrus pyraaster S-RNase (S-RNase) gene, S-RNase-S42.25 allele, partial cds. |
| AGF69998.1 | 65 | Pyrus pyraaster S-RNase (S-RNase) gene, S-RNase-S42.26 allele, partial cds. |
| AGF70000.1 | 65 | Pyrus pyraaster S-RNase (S-RNase) gene, S-RNase-S42.28 allele, partial cds. |
| AGF70006.1 | 65 | Pyrus pyraaster S-RNase (S-RNase) gene, S-RNase-S42.34 allele, partial cds. |
| AGF70008.1 | 65 | Pyrus pyraaster S-RNase (S-RNase) gene, S-RNase-S42.36 allele, partial cds. |

|            |    |                                                                                    |
|------------|----|------------------------------------------------------------------------------------|
| AGF70011.1 | 65 | <i>Pyrus pyra</i> ster S-RNase (S-RNase) gene, S-RNase-S43.03 allele, partial cds. |
| AGF70012.1 | 65 | <i>Pyrus pyra</i> ster S-RNase (S-RNase) gene, S-RNase-S43.04 allele, partial cds. |
| AGF70014.1 | 65 | <i>Pyrus pyra</i> ster S-RNase (S-RNase) gene, S-RNase-S43.06 allele, partial cds. |
| AGF70027.1 | 65 | <i>Pyrus pyra</i> ster S-RNase (S-RNase) gene, S-RNase-S45.01 allele, partial cds. |
| AGF70032.1 | 65 | <i>Pyrus pyra</i> ster S-RNase (S-RNase) gene, S-RNase-S47.04 allele, partial cds. |
| AGF70033.1 | 65 | <i>Pyrus pyra</i> ster S-RNase (S-RNase) gene, S-RNase-S47.05 allele, partial cds. |
| AGF70038.1 | 65 | <i>Pyrus pyra</i> ster S-RNase (S-RNase) gene, S-RNase-S47.10 allele, partial cds. |
| AGF70039.1 | 65 | <i>Pyrus pyra</i> ster S-RNase (S-RNase) gene, S-RNase-S47.11 allele, partial cds. |
| AGF70040.1 | 65 | <i>Pyrus pyra</i> ster S-RNase (S-RNase) gene, S-RNase-S47.12 allele, partial cds. |
| AGF70041.1 | 65 | <i>Pyrus pyra</i> ster S-RNase (S-RNase) gene, S-RNase-S47.13 allele, partial cds. |
| AGF70042.1 | 65 | <i>Pyrus pyra</i> ster S-RNase (S-RNase) gene, S-RNase-S47.14 allele, partial cds. |
| AGF70043.1 | 65 | <i>Pyrus pyra</i> ster S-RNase (S-RNase) gene, S-RNase-S47.15 allele, partial cds. |
| AGF70045.1 | 65 | <i>Pyrus pyra</i> ster S-RNase (S-RNase) gene, S-RNase-S47.17 allele, partial cds. |
| AGF70046.1 | 65 | <i>Pyrus pyra</i> ster S-RNase (S-RNase) gene, S-RNase-S47.18 allele, partial cds. |
| AGF70049.1 | 65 | <i>Pyrus pyra</i> ster S-RNase (S-RNase) gene, S-RNase-S47.21 allele, partial cds. |
| AGF70055.1 | 65 | <i>Pyrus pyra</i> ster S-RNase (S-RNase) gene, S-RNase-S48.04 allele, partial cds. |
| AGF70056.1 | 65 | <i>Pyrus pyra</i> ster S-RNase (S-RNase) gene, S-RNase-S48.05 allele, partial cds. |
| AGF70058.1 | 65 | <i>Pyrus pyra</i> ster S-RNase (S-RNase) gene, S-RNase-S48.07 allele, partial cds. |
| AGF70062.1 | 65 | <i>Pyrus pyra</i> ster S-RNase (S-RNase) gene, S-RNase-S49.04 allele, partial cds. |
| AGF70076.1 | 65 | <i>Pyrus pyra</i> ster S-RNase (S-RNase) gene, S-RNase-S52.01 allele, partial cds. |
| AGF70079.1 | 65 | <i>Pyrus pyra</i> ster S-RNase (S-RNase) gene, S-RNase-S52.04 allele, partial cds. |
| BAO05501.1 | 65 | <i>Eriobotrya japonica</i> S-RNase gene, partial cds, allele: S10.                 |
| AGF69938.1 | 64 | <i>Pyrus pyra</i> ster S-RNase (S-RNase) gene, S-RNase-S39.03 allele, partial cds. |
| AGF69940.1 | 64 | <i>Pyrus pyra</i> ster S-RNase (S-RNase) gene, S-RNase-S39.05 allele, partial cds. |
| AGF69943.1 | 64 | <i>Pyrus pyra</i> ster S-RNase (S-RNase) gene, S-RNase-S39.09 allele, partial cds. |
| AGF69945.1 | 64 | <i>Pyrus pyra</i> ster S-RNase (S-RNase) gene, S-RNase-S39.11 allele, partial cds. |

|            |    |                                                                                                             |
|------------|----|-------------------------------------------------------------------------------------------------------------|
| AGF69946.1 | 64 | <i>Pyrus pyra</i> ster S-RNase (S-RNase) gene, S-RNase-S39.12 allele, partial cds.                          |
| AGF69948.1 | 64 | <i>Pyrus pyra</i> ster S-RNase (S-RNase) gene, S-RNase-S39.14 allele, partial cds.                          |
| AGF69949.1 | 64 | <i>Pyrus pyra</i> ster S-RNase (S-RNase) gene, S-RNase-S39.15 allele, partial cds.                          |
| AGF69950.1 | 64 | <i>Pyrus pyra</i> ster S-RNase (S-RNase) gene, S-RNase-S39.16 allele, partial cds.                          |
| AGF69951.1 | 64 | <i>Pyrus pyra</i> ster S-RNase (S-RNase) gene, S-RNase-S40.01 allele, partial cds.                          |
| AGF69952.1 | 64 | <i>Pyrus pyra</i> ster S-RNase (S-RNase) gene, S-RNase-S40.02 allele, partial cds.                          |
| AGF69956.1 | 64 | <i>Pyrus pyra</i> ster S-RNase (S-RNase) gene, S-RNase-S41.02 allele, partial cds.                          |
| AGF69958.1 | 64 | <i>Pyrus pyra</i> ster S-RNase (S-RNase) gene, S-RNase-S41.04 allele, partial cds.                          |
| AGF69959.1 | 64 | <i>Pyrus pyra</i> ster S-RNase (S-RNase) gene, S-RNase-S41.05 allele, partial cds.                          |
| AGF69961.1 | 64 | <i>Pyrus pyra</i> ster S-RNase (S-RNase) gene, S-RNase-S41.07 allele, partial cds.                          |
| AGF69963.1 | 64 | <i>Pyrus pyra</i> ster S-RNase (S-RNase) gene, S-RNase-S41.09 allele, partial cds.                          |
| AGF69964.1 | 64 | <i>Pyrus pyra</i> ster S-RNase (S-RNase) gene, S-RNase-S41.10 allele, partial cds.                          |
| AGF69967.1 | 64 | <i>Pyrus pyra</i> ster S-RNase (S-RNase) gene, S-RNase-S41.13 allele, partial cds.                          |
| AGF69968.1 | 64 | <i>Pyrus pyra</i> ster S-RNase (S-RNase) gene, S-RNase-S41.14 allele, partial cds.                          |
| AGF69969.1 | 64 | <i>Pyrus pyra</i> ster S-RNase (S-RNase) gene, S-RNase-S41.15 allele, partial cds.                          |
| AGF69970.1 | 64 | <i>Pyrus pyra</i> ster S-RNase (S-RNase) gene, S-RNase-S41.16 allele, partial cds.                          |
| AGF69971.1 | 64 | <i>Pyrus pyra</i> ster S-RNase (S-RNase) gene, S-RNase-S41.17 allele, partial cds.                          |
| AGF70084.1 | 64 | <i>Pyrus pyra</i> ster S-RNase (S-RNase) gene, S-RNase-S53.02 allele, partial cds.                          |
| AGF70085.1 | 64 | <i>Pyrus pyra</i> ster S-RNase (S-RNase) gene, S-RNase-S53.03 allele, partial cds.                          |
| AGF70064.1 | 63 | <i>Pyrus pyra</i> ster S-RNase (S-RNase) gene, S-RNase-S50.02 allele, partial cds.                          |
| AGF70069.1 | 63 | <i>Pyrus pyra</i> ster S-RNase (S-RNase) gene, S-RNase-S50.07 allele, partial cds.                          |
| AGF70073.1 | 63 | <i>Pyrus pyra</i> ster S-RNase (S-RNase) gene, S-RNase-S51.03 allele, partial cds.                          |
| AIG55245.1 | 62 | <i>Malus sikkimensis</i> self-incompatibility ribonuclease (S-RNase) gene, S-RNase-S7 allele, complete cds. |
| ACA34980.1 | 61 | <i>Malus x domestica</i> S35-RNase gene, partial cds.                                                       |
| ACA34981.1 | 59 | <i>Malus x domestica</i> S36-RNase gene, partial cds.                                                       |
| ACA34983.1 | 59 | <i>Malus x domestica</i> S38-RNase gene, partial cds.                                                       |



|            |    |                                                                             |
|------------|----|-----------------------------------------------------------------------------|
| ACA34986.1 | 59 | Malus x domestica S41-RNase gene, partial cds.                              |
| ACA34982.1 | 58 | Malus x domestica S37-RNase gene, partial cds.                              |
| ACA34984.1 | 58 | Malus x domestica S39-RNase gene, partial cds.                              |
| ACA34985.1 | 57 | Malus x domestica S40-RNase gene, partial cds.                              |
| ACA34987.1 | 57 | Malus x domestica S42-RNase gene, partial cds.                              |
| AGF70028.1 | 55 | Pyrus pyraaster S-RNase (S-RNase) gene, S-RNase-S46.01 allele, partial cds. |
| ACD62796.1 | 54 | Pyrus pyraaster S-RNase (S) gene, S25_(G2-2) allele, partial cds.           |
| BAC75874.1 | 54 | Malus x domestica gene for S19-RNase, partial cds, cultivar:Bohnapfel.      |
| BAC85102.1 | 54 | Malus x domestica S12 gene for S12-RNase, partial cds.                      |
| BAC85103.1 | 54 | Malus x domestica S17 gene for S17-RNase, partial cds.                      |
| AAZ66325.1 | 52 | Pyrus ussuriensis S33-RNase gene, partial cds.                              |
| ACD62797.1 | 51 | Pyrus pyraaster S-RNase (S) gene, S26_(G3-1) allele, partial cds.           |
| ACD62801.1 | 49 | Pyrus pyraaster S-RNase (S) gene, S30_(G5-4) allele, partial cds.           |
| ACD62800.1 | 48 | Pyrus pyraaster S-RNase (S) gene, S29_(G4-3) allele, partial cds.           |
| ACD62799.1 | 47 | Pyrus pyraaster S-RNase (S) gene, S28_(G4-1) allele, partial cds.           |
| ACD62794.1 | 45 | Pyrus pyraaster S-RNase (S) gene, S23_(G1-3) allele, partial cds.           |
| ACD62795.1 | 45 | Pyrus pyraaster S-RNase (S) gene, S24_(G2-1) allele, partial cds.           |

---

**Table S6.** Population sizes ( $N$ ), locations, and genetic diversity of  $S$ -alleles in the 6 *Malus sieversii* populations.

| Population       | Latitude (N) | Longitude (E) | No. $S$ -alleles observed | $N_e$ | $I$   | $H_o$ | $H_e$ | AR    | $F_{IS}$ | HW equilibrium test ( $P$ value) |
|------------------|--------------|---------------|---------------------------|-------|-------|-------|-------|-------|----------|----------------------------------|
| E Ming (EM)      | 46.36        | 83.54         | 8                         | 5.556 | 1.878 | 1.000 | 0.820 | 6.441 | -0.169   | 0.582                            |
| Lao Fen Kou (FK) | 46.15        | 83.53         | 10                        | 7.420 | 2.122 | 1.000 | 0.865 | 7.008 | -0.124   | 0.043*                           |
| Xin Yuan (XY)    | 43.38        | 83.56         | 11                        | 6.857 | 2.045 | 1.000 | 0.854 | 6.960 | -0.128   | 0.595                            |
| Mo He (MH)       | 43.18        | 82.73         | 9                         | 5.851 | 1.947 | 1.000 | 0.829 | 6.387 | -0.170   | 0.955                            |
| Da Xi Gou (DX)   | 44.43        | 80.76         | 11                        | 7.692 | 2.155 | 1.000 | 0.870 | 7.691 | -0.098   | 0.067                            |
| Yi Ling (YL)     | 44.12        | 81.62         | 9                         | 7.200 | 2.023 | 1.000 | 0.861 | 8.000 | -0.071   | 0.236                            |

$N_e$ : Effective numbers of  $S$ -alleles,  $I$ : Shannon's diversity index,  $H_o$ : observed heterozygosity,  $H_e$ : expected heterozygosity, AR: allelic richness,  $F_{IS}$ : inbreeding coefficient.

**Table S7.** Summary of nucleotide polymorphisms and neutrality tests for the 8 reference loci.

| Population     | Locus      | $S$ | $h$ | $\theta_{\text{sil}}$ | $\pi_{\text{sil}}$ | $\theta_{\text{all}}$ | $\pi_{\text{all}}$ | $D$     | $D^*$    | $F^*$   |
|----------------|------------|-----|-----|-----------------------|--------------------|-----------------------|--------------------|---------|----------|---------|
| EM<br>(n = 12) | <i>C1</i>  | 3   | 2   | 0.0017                | 0.0029             | 0.0013                | 0.0022             | 1.8408  | 0.9795   | 1.4090  |
|                | <i>C9</i>  | 4   | 4   | 0.0043                | 0.0046             | 0.0025                | 0.0032             | 0.7712  | 0.1142   | 0.3478  |
|                | <i>C10</i> | 7   | 4   | 0.0050                | 0.0067             | 0.0027                | 0.0043             | 1.8705  | 0.6292   | 1.1511  |
|                | <i>C11</i> | 8   | 2   | 0.0042                | 0.0074             | 0.0039                | 0.0068             | 2.3481* | 1.3336   | 1.8962* |
|                | <i>C12</i> | 2   | 3   | 0.0009                | 0.0010             | 0.0008                | 0.0010             | 0.4044  | 0.8373   | 0.8264  |
|                | <i>C15</i> | 6   | 5   | 0.0021                | 0.0024             | 0.0017                | 0.0020             | 0.5288  | 1.2325   | 1.1932  |
|                | <i>C16</i> | 4   | 3   | 0.0018                | 0.0010             | 0.0014                | 0.0008             | -1.1438 | -0.8560  | -1.0844 |
|                | <i>C17</i> | 4   | 4   | 0.0040                | 0.0050             | 0.0020                | 0.0025             | 0.6787  | 1.0844   | 1.1208  |
| FK<br>(n = 13) | <i>C1</i>  | 3   | 2   | 0.0016                | 0.0031             | 0.0013                | 0.0024             | 2.1561* | 0.9684   | 1.5075  |
|                | <i>C9</i>  | 4   | 4   | 0.0042                | 0.0063             | 0.0024                | 0.0039             | 1.6808  | 1.0747   | 1.4459  |
|                | <i>C10</i> | 7   | 4   | 0.0049                | 0.0067             | 0.0026                | 0.0039             | 1.4521  | 1.2822   | 1.5497  |
|                | <i>C11</i> | 8   | 2   | 0.0042                | 0.0065             | 0.0038                | 0.0060             | 1.7657  | 1.3300   | 1.6994* |
|                | <i>C12</i> | 3   | 4   | 0.0013                | 0.0014             | 0.0012                | 0.0013             | 0.1776  | -0.2160  | -0.1209 |
|                | <i>C15</i> | 6   | 4   | 0.0020                | 0.0027             | 0.0017                | 0.0022             | 0.9441  | 0.4762   | 0.7124  |
|                | <i>C16</i> | 7   | 4   | 0.0030                | 0.0018             | 0.0024                | 0.0015             | -1.1870 | -2.0783  | -2.1112 |
|                | <i>C17</i> | 2   | 3   | 0.0020                | 0.0038             | 0.0010                | 0.0019             | 2.0579* | 0.8256   | 1.3468  |
| XY<br>(n = 12) | <i>C1</i>  | 3   | 2   | 0.0017                | 0.0024             | 0.0013                | 0.0019             | 1.1602  | 0.9795   | 1.1888  |
|                | <i>C9</i>  | 4   | 4   | 0.0043                | 0.0083             | 0.0025                | 0.0038             | 1.4372  | 0.1142   | 0.5665  |
|                | <i>C10</i> | 7   | 4   | 0.0050                | 0.0061             | 0.0027                | 0.0034             | 0.8375  | 1.2873   | 1.3424  |
|                | <i>C11</i> | 9   | 3   | 0.0048                | 0.0074             | 0.0044                | 0.0068             | 1.7877  | 1.3732*  | 1.7398* |
|                | <i>C12</i> | 3   | 4   | 0.0013                | 0.0012             | 0.0012                | 0.0011             | -0.2238 | -0.1889  | -0.2293 |
|                | <i>C15</i> | 21  | 7   | 0.0072                | 0.0048             | 0.0060                | 0.0040             | -1.2157 | -2.5114* | -2.4732 |
|                | <i>C16</i> | 6   | 4   | 0.0026                | 0.0016             | 0.0021                | 0.0013             | -1.2034 | -1.7080  | -1.8116 |

|                |            |    |   |        |        |        |        |           |          |          |
|----------------|------------|----|---|--------|--------|--------|--------|-----------|----------|----------|
|                | <i>C17</i> | 3  | 3 | 0.0030 | 0.0020 | 0.0015 | 0.0010 | -0.8023   | 0.9795   | 0.5541   |
| MH<br>(n = 13) | <i>C1</i>  | 5  | 4 | 0.0027 | 0.0037 | 0.0021 | 0.0028 | 1.0125    | 0.3082   | 0.5946   |
|                | <i>C9</i>  | 5  | 5 | 0.0042 | 0.0065 | 0.0030 | 0.0034 | 0.4070    | 0.3082   | 0.3908   |
|                | <i>C10</i> | 7  | 4 | 0.0049 | 0.0053 | 0.0026 | 0.0030 | 0.4458    | 0.6101   | 0.6532   |
|                | <i>C11</i> | 16 | 3 | 0.0083 | 0.0122 | 0.0077 | 0.0113 | 1.6568    | 1.5522*  | 1.8537*  |
|                | <i>C12</i> | 2  | 3 | 0.0008 | 0.0014 | 0.0008 | 0.0013 | 1.2909    | 0.8256   | 1.1008   |
|                | <i>C15</i> | 22 | 9 | 0.0070 | 0.0060 | 0.0062 | 0.0052 | -0.5691   | 1.0897   | 0.6721   |
|                | <i>C16</i> | 7  | 6 | 0.0030 | 0.0040 | 0.0024 | 0.0032 | 1.0003    | 1.2822   | 1.3945   |
|                | <i>C17</i> | 3  | 3 | 0.0029 | 0.0033 | 0.0014 | 0.0016 | 0.3121    | 0.9684   | 0.9045   |
| DX<br>(n = 12) | <i>C1</i>  | 4  | 4 | 0.0022 | 0.0034 | 0.0017 | 0.0026 | 1.5020    | 1.0844   | 1.3911   |
|                | <i>C9</i>  | 6  | 6 | 0.0057 | 0.0066 | 0.0037 | 0.0037 | 0.0105    | -0.2378  | -0.1924  |
|                | <i>C10</i> | 7  | 4 | 0.0050 | 0.0063 | 0.0027 | 0.0042 | 1.7256    | 0.6292   | 1.1020   |
|                | <i>C11</i> | 8  | 2 | 0.0042 | 0.0083 | 0.0039 | 0.0076 | 3.0426*** | 1.3336   | 2.1333*  |
|                | <i>C12</i> | 12 | 4 | 0.0052 | 0.0033 | 0.0050 | 0.0032 | -1.2491   | -2.0295  | -2.0933  |
|                | <i>C15</i> | 21 | 7 | 0.0072 | 0.0055 | 0.0060 | 0.0046 | -0.8664   | -2.2364  | -2.1251  |
|                | <i>C16</i> | 3  | 2 | 0.0012 | 0.0023 | 0.0010 | 0.0019 | 2.3853*   | 0.9795   | 1.5851   |
|                | <i>C17</i> | 6  | 5 | 0.0050 | 0.0038 | 0.0030 | 0.0023 | -0.6783   | -0.2378  | -0.4237  |
| YL<br>(n = 12) | <i>C1</i>  | 4  | 3 | 0.0022 | 0.0032 | 0.0017 | 0.0025 | 1.2245    | 0.1142   | 0.4966   |
|                | <i>C9</i>  | 5  | 5 | 0.0057 | 0.0085 | 0.0031 | 0.0040 | 0.8818    | 1.1663   | 1.2564   |
|                | <i>C10</i> | 6  | 3 | 0.0037 | 0.0034 | 0.0023 | 0.0023 | 0.0037    | 1.2325   | 1.0169   |
|                | <i>C11</i> | 16 | 3 | 0.0085 | 0.0097 | 0.0078 | 0.0090 | 0.5102    | 1.5462*  | 1.4391   |
|                | <i>C12</i> | 9  | 4 | 0.0039 | 0.0039 | 0.0037 | 0.0037 | -0.0206   | 1.3732*  | 1.1187   |
|                | <i>C15</i> | 20 | 6 | 0.0068 | 0.0042 | 0.0057 | 0.0035 | -1.4336   | -2.6985* | -2.7031* |
|                | <i>C16</i> | 8  | 7 | 0.0035 | 0.0044 | 0.0029 | 0.0036 | 0.8124    | 1.3336   | 1.3722   |
|                | <i>C17</i> | 4  | 4 | 0.0040 | 0.0044 | 0.0020 | 0.0022 | 0.2901    | 1.0844   | 0.9932   |

$S$ , number of segregating sites.  $h$ , number of haplotypes.  $\theta_{\text{sil}}$  and  $\theta_{\text{all}}$ , Watterson's estimator of  $\theta$  per base pair (Watterson, 1975), calculated based on the silent and the total number of polymorphic sites, respectively.  $\pi_{\text{sil}}$  and  $\pi_{\text{all}}$ , average number of pairwise nucleotide differences per site (Nei, 1987), calculated based on the silent and the total number of polymorphic sites, respectively.

$D$  and  $D^*/F^*$ , Tajima's  $D$  (Tajima, 1989) and Fu and Li's  $D^*$  and  $F^*$  (Fu and Li, 1993).

\*  $P < 0.05$ , \*\*  $P < 0.01$ , \*\*\*  $P < 0.001$ .

**Table S8.** Posterior probabilities of the four demographic models for each population.

| Population        | Models            |                  |            |                   |
|-------------------|-------------------|------------------|------------|-------------------|
|                   | Stable            | Bottleneck       | Expansion  | Decline           |
| DX                | <b>0.31/ 0.30</b> | 0.13/0.13        | 0.28/ 0.29 | 0.28/ 0.28        |
| EM                | 0.11/ 0.13        | <b>0.74/0.61</b> | 0.08/ 0.13 | 0.07/ 0.13        |
| FK                | 0.18/ 0.17        | <b>0.50/0.52</b> | 0.14/ 0.15 | 0.18/ 0.16        |
| MH                | 0.12/ 0.17        | <b>0.55/0.53</b> | 0.21/ 0.14 | 0.11/ 0.17        |
| XY                | 0.26/ 0.25        | 0.23/0.23        | 0.25/ 0.25 | <b>0.26/ 0.27</b> |
| YL                | 0.18/ 0.20        | <b>0.43/0.39</b> | 0.18/ 0.19 | 0.22/ 0.22        |
| Merged population | 0.16/0.16         | <b>0.47/0.48</b> | 0.18/0.17  | 0.19/0.19         |

The two values before and after slash indicated the posterior probabilities using neuralnet and rejection methods, respectively.

**Table S9.** Three additional priors with wide-ranges used to test the robustness of model selection.

| Parameters             | Prior1           | Prior2           | Prior3           |
|------------------------|------------------|------------------|------------------|
| $N_{\text{present}}$   | 10000 to 300000  | 100000 to 250000 | 50000 to 200000  |
| $N_{\text{ancestral}}$ | 10000 to 300000  | 200000 to 500000 | 100000 to 500000 |
| $N_b$                  | 10000 to 300000  | 10000 to 100000  | 5000 to 100000   |
| T                      | 1000 to 100000   | 10000 to 100000  | 1000 to 500000   |
| $T_b$                  | 500 to 10000     | 1000 to 10000    | 500 to 50000     |
| $r_e$                  | 1e-7 to 1e-5     | 1e-9 to 1e-5     | 1e-9 to 1e-5     |
| $r_d$                  | -1e-5 to -1e-7   | -1e-5 to -1e-9   | -1e-5 to -1e-9   |
| $\mu$                  | 0.5e-8 to 1.5e-8 | 0.5e-8 to 2.5e-8 | 0.5e-8 to 2e-8   |

**Table S10.** Posterior probabilities of four demographic models with different method (rejection and neuralnet), priors and tolerance levels (referred as tol).

| Population        | Prior  | rejection (tol=0.01) |           |        |         | nnet (tol=0.01) |           |        |         |
|-------------------|--------|----------------------|-----------|--------|---------|-----------------|-----------|--------|---------|
|                   |        | Bottleneck           | Expansion | Stable | Decline | Bottleneck      | Expansion | Stable | Decline |
| DX                | Prior1 | 0.2773               | 0.2424    | 0.2466 | 0.2337  | 0.2849          | 0.2424    | 0.2382 | 0.2345  |
| EM                | Prior1 | 0.3406               | 0.1840    | 0.2220 | 0.2534  | 0.3933          | 0.1610    | 0.1733 | 0.2725  |
| FK                | Prior1 | 0.3382               | 0.1901    | 0.2217 | 0.2499  | 0.5763          | 0.1234    | 0.1169 | 0.1834  |
| MH                | Prior1 | 0.2960               | 0.1898    | 0.2351 | 0.2791  | 0.2060          | 0.2153    | 0.2066 | 0.3722  |
| XY                | Prior1 | 0.2742               | 0.2156    | 0.2452 | 0.2650  | 0.2593          | 0.1550    | 0.2676 | 0.3181  |
| YL                | Prior1 | 0.2740               | 0.2001    | 0.2406 | 0.2854  | 0.4531          | 0.1694    | 0.1742 | 0.2034  |
| Merged population | Prior1 | 0.2984               | 0.1985    | 0.2284 | 0.2748  | 0.2905          | 0.1779    | 0.2180 | 0.3136  |

  

| Population        | Prior  | rejection (tol=0.001) |           |        |         | nnet (tol=0.001) |           |        |         |
|-------------------|--------|-----------------------|-----------|--------|---------|------------------|-----------|--------|---------|
|                   |        | Bottleneck            | Expansion | Stable | Decline | Bottleneck       | Expansion | Stable | Decline |
| DX                | Prior1 | 0.2912                | 0.2435    | 0.2410 | 0.2242  | 0.3078           | 0.2391    | 0.2376 | 0.2154  |
| EM                | Prior1 | 0.3620                | 0.1755    | 0.2190 | 0.2435  | 0.4234           | 0.1581    | 0.1964 | 0.2222  |
| FK                | Prior1 | 0.3482                | 0.1755    | 0.2275 | 0.2488  | 0.3598           | 0.1316    | 0.1691 | 0.3395  |
| MH                | Prior1 | 0.3065                | 0.1947    | 0.2262 | 0.2725  | 0.2846           | 0.1873    | 0.2354 | 0.2926  |
| XY                | Prior1 | 0.2758                | 0.2138    | 0.2385 | 0.2720  | 0.2595           | 0.2139    | 0.2540 | 0.2726  |
| YL                | Prior1 | 0.2718                | 0.2037    | 0.2438 | 0.2808  | 0.2196           | 0.3042    | 0.1989 | 0.2773  |
| Merged population | Prior1 | 0.3035                | 0.1920    | 0.2225 | 0.2820  | 0.2860           | 0.1903    | 0.2279 | 0.2958  |



| Population        | Prior  | rejection (tol=0.0005) |           |        |         | nnet (tol=0.0005) |           |        |         |
|-------------------|--------|------------------------|-----------|--------|---------|-------------------|-----------|--------|---------|
|                   |        | Bottleneck             | Expansion | Stable | Decline | Bottleneck        | Expansion | Stable | Decline |
| DX                | Prior1 | 0.2950                 | 0.2515    | 0.2345 | 0.2190  | 0.3072            | 0.2422    | 0.2316 | 0.2191  |
| EM                | Prior1 | 0.3680                 | 0.1590    | 0.2270 | 0.2460  | 0.4037            | 0.1671    | 0.1899 | 0.2393  |
| FK                | Prior1 | 0.3495                 | 0.1720    | 0.2215 | 0.2570  | 0.3412            | 0.1534    | 0.2033 | 0.3021  |
| MH                | Prior1 | 0.3100                 | 0.1960    | 0.2230 | 0.2710  | 0.2052            | 0.1711    | 0.2623 | 0.3613  |
| XY                | Prior1 | 0.2775                 | 0.2110    | 0.2405 | 0.2710  | 0.2729            | 0.2127    | 0.2479 | 0.2665  |
| YL                | Prior1 | 0.2825                 | 0.2065    | 0.2385 | 0.2725  | 0.2619            | 0.2589    | 0.2197 | 0.2596  |
| Merged population | Prior1 | 0.2855                 | 0.1930    | 0.2220 | 0.2995  | 0.2934            | 0.1925    | 0.2139 | 0.3003  |

| Population        | Prior  | rejection (tol=0.0002) |           |        |         | nnet (tol=0.0002) |           |        |         |
|-------------------|--------|------------------------|-----------|--------|---------|-------------------|-----------|--------|---------|
|                   |        | Bottleneck             | Expansion | Stable | Decline | Bottleneck        | Expansion | Stable | Decline |
| DX                | Prior1 | 0.2675                 | 0.2550    | 0.2275 | 0.2500  | 0.2790            | 0.2706    | 0.2154 | 0.2350  |
| EM                | Prior1 | 0.3800                 | 0.1550    | 0.2188 | 0.2462  | 0.4094            | 0.1457    | 0.2168 | 0.2281  |
| FK                | Prior1 | 0.3625                 | 0.1525    | 0.2288 | 0.2562  | 0.3137            | 0.1379    | 0.1995 | 0.3490  |
| MH                | Prior1 | 0.3062                 | 0.1912    | 0.2312 | 0.2712  | 0.3108            | 0.1860    | 0.2364 | 0.2668  |
| XY                | Prior1 | 0.2738                 | 0.2212    | 0.2500 | 0.2550  | 0.2774            | 0.2223    | 0.2486 | 0.2518  |
| YL                | Prior1 | 0.2750                 | 0.2188    | 0.2400 | 0.2662  | 0.2819            | 0.2151    | 0.2308 | 0.2723  |
| Merged population | Prior1 | 0.2988                 | 0.1975    | 0.2025 | 0.3012  | 0.3077            | 0.1955    | 0.1925 | 0.3043  |

| Population | Prior | rejection (tol=0.01) |           |        |         | nnet (tol=0.01) |           |        |         |
|------------|-------|----------------------|-----------|--------|---------|-----------------|-----------|--------|---------|
|            |       | Bottleneck           | Expansion | Stable | Decline | Bottleneck      | Expansion | Stable | Decline |

|                   |        |        |        |        |        |        |        |        |        |
|-------------------|--------|--------|--------|--------|--------|--------|--------|--------|--------|
| DX                | Prior2 | 0.1810 | 0.2795 | 0.2770 | 0.2624 | 0.1825 | 0.2711 | 0.2775 | 0.2689 |
| EM                | Prior2 | 0.3824 | 0.1930 | 0.2014 | 0.2232 | 0.3891 | 0.2204 | 0.1407 | 0.2499 |
| FK                | Prior2 | 0.3632 | 0.2037 | 0.2109 | 0.2222 | 0.4880 | 0.1345 | 0.2074 | 0.1702 |
| MH                | Prior2 | 0.3346 | 0.2106 | 0.2195 | 0.2354 | 0.3091 | 0.2662 | 0.2196 | 0.2051 |
| XY                | Prior2 | 0.2129 | 0.2568 | 0.2670 | 0.2632 | 0.2169 | 0.2518 | 0.2688 | 0.2625 |
| YL                | Prior2 | 0.2787 | 0.2299 | 0.2392 | 0.2522 | 0.4053 | 0.1359 | 0.1925 | 0.2664 |
| Merged population | Prior2 | 0.3572 | 0.2012 | 0.2122 | 0.2294 | 0.3490 | 0.2049 | 0.2133 | 0.2328 |

| Population        | Prior  | rejection (tol=0.001) |           |        |         | nnet (tol=0.001) |           |        |         |
|-------------------|--------|-----------------------|-----------|--------|---------|------------------|-----------|--------|---------|
|                   |        | Bottleneck            | Expansion | Stable | Decline | Bottleneck       | Expansion | Stable | Decline |
| DX                | Prior2 | 0.1795                | 0.2790    | 0.2782 | 0.2632  | 0.1825           | 0.2744    | 0.2860 | 0.2571  |
| EM                | Prior2 | 0.3788                | 0.1955    | 0.1970 | 0.2288  | 0.3616           | 0.2077    | 0.1992 | 0.2314  |
| FK                | Prior2 | 0.3575                | 0.2045    | 0.2188 | 0.2192  | 0.3481           | 0.1996    | 0.2054 | 0.2469  |
| MH                | Prior2 | 0.3298                | 0.2150    | 0.2188 | 0.2365  | 0.3287           | 0.2180    | 0.2163 | 0.2370  |
| XY                | Prior2 | 0.2185                | 0.2547    | 0.2630 | 0.2638  | 0.2162           | 0.2647    | 0.2604 | 0.2587  |
| YL                | Prior2 | 0.2832                | 0.2205    | 0.2460 | 0.2502  | 0.2824           | 0.2234    | 0.2439 | 0.2503  |
| Merged population | Prior2 | 0.3622                | 0.1982    | 0.2068 | 0.2328  | 0.3625           | 0.2002    | 0.2002 | 0.2371  |

| Population | Prior  | rejection (tol=0.0005) |           |        |         | nnet (tol=0.0005) |           |        |         |
|------------|--------|------------------------|-----------|--------|---------|-------------------|-----------|--------|---------|
|            |        | Bottleneck             | Expansion | Stable | Decline | Bottleneck        | Expansion | Stable | Decline |
| DX         | Prior2 | 0.1845                 | 0.2805    | 0.2720 | 0.2630  | 0.1877            | 0.2747    | 0.2700 | 0.2676  |
| EM         | Prior2 | 0.3795                 | 0.1945    | 0.1955 | 0.2305  | 0.3794            | 0.1893    | 0.2011 | 0.2302  |

|                   |        |        |        |        |        |        |        |        |        |
|-------------------|--------|--------|--------|--------|--------|--------|--------|--------|--------|
| FK                | Prior2 | 0.3490 | 0.2105 | 0.2175 | 0.2230 | 0.3456 | 0.2208 | 0.2151 | 0.2185 |
| MH                | Prior2 | 0.3255 | 0.2200 | 0.2140 | 0.2405 | 0.3208 | 0.2226 | 0.2105 | 0.2462 |
| XY                | Prior2 | 0.2140 | 0.2670 | 0.2625 | 0.2565 | 0.2140 | 0.2764 | 0.2534 | 0.2562 |
| YL                | Prior2 | 0.2805 | 0.2275 | 0.2440 | 0.2480 | 0.2846 | 0.2249 | 0.2363 | 0.2543 |
| Merged population | Prior2 | 0.3630 | 0.1990 | 0.2050 | 0.2330 | 0.3598 | 0.2008 | 0.1906 | 0.2487 |

| Population        | Prior  | rejection (tol=0.0002) |           |        |         | nnet (tol=0.0002) |           |        |         |
|-------------------|--------|------------------------|-----------|--------|---------|-------------------|-----------|--------|---------|
|                   |        | Bottleneck             | Expansion | Stable | Decline | Bottleneck        | Expansion | Stable | Decline |
| DX                | Prior2 | 0.1913                 | 0.2925    | 0.2537 | 0.2625  | 0.1923            | 0.2749    | 0.2645 | 0.2684  |
| EM                | Prior2 | 0.3975                 | 0.1725    | 0.1975 | 0.2325  | 0.3815            | 0.1769    | 0.2104 | 0.2313  |
| FK                | Prior2 | 0.3538                 | 0.2225    | 0.2212 | 0.2025  | 0.3366            | 0.2287    | 0.2316 | 0.2031  |
| MH                | Prior2 | 0.3213                 | 0.2100    | 0.2125 | 0.2562  | 0.2995            | 0.2166    | 0.2157 | 0.2683  |
| XY                | Prior2 | 0.2100                 | 0.2812    | 0.2438 | 0.2650  | 0.2177            | 0.2872    | 0.2260 | 0.2692  |
| YL                | Prior2 | 0.2775                 | 0.2288    | 0.2462 | 0.2475  | 0.2861            | 0.2294    | 0.2333 | 0.2511  |
| Merged population | Prior2 | 0.3650                 | 0.2062    | 0.1888 | 0.2400  | 0.3501            | 0.2042    | 0.1812 | 0.2645  |

| Population | Prior  | rejection (tol=0.01) |           |        |         | nnet (tol=0.01) |           |        |         |
|------------|--------|----------------------|-----------|--------|---------|-----------------|-----------|--------|---------|
|            |        | Bottleneck           | Expansion | Stable | Decline | Bottleneck      | Expansion | Stable | Decline |
| DX         | Prior3 | 0.1840               | 0.2724    | 0.2739 | 0.2697  | 0.1815          | 0.2687    | 0.2770 | 0.2728  |
| EM         | Prior3 | 0.4992               | 0.1534    | 0.1655 | 0.1819  | 0.9267          | 0.0217    | 0.0295 | 0.0222  |
| FK         | Prior3 | 0.4464               | 0.1695    | 0.1837 | 0.2004  | 0.6674          | 0.0669    | 0.0956 | 0.1701  |
| MH         | Prior3 | 0.4412               | 0.1660    | 0.1829 | 0.2098  | 0.7808          | 0.1599    | 0.0157 | 0.0436  |

|                   |        |        |        |        |        |        |        |        |        |
|-------------------|--------|--------|--------|--------|--------|--------|--------|--------|--------|
| XY                | Prior3 | 0.2238 | 0.2503 | 0.2581 | 0.2678 | 0.2318 | 0.2513 | 0.2598 | 0.2571 |
| YL                | Prior3 | 0.3396 | 0.2011 | 0.2194 | 0.2399 | 0.3738 | 0.1456 | 0.2136 | 0.2669 |
| Merged population | Prior3 | 0.3968 | 0.1870 | 0.2003 | 0.2159 | 0.5017 | 0.1339 | 0.1414 | 0.2229 |

| Population        | Prior  | rejection (tol=0.001) |           |        |         | nnet (tol=0.001) |           |        |         |
|-------------------|--------|-----------------------|-----------|--------|---------|------------------|-----------|--------|---------|
|                   |        | Bottleneck            | Expansion | Stable | Decline | Bottleneck       | Expansion | Stable | Decline |
| DX                | Prior3 | 0.1925                | 0.2620    | 0.2710 | 0.2745  | 0.1834           | 0.2836    | 0.2604 | 0.2725  |
| EM                | Prior3 | 0.5675                | 0.1212    | 0.1440 | 0.1672  | 0.6692           | 0.0803    | 0.1166 | 0.1338  |
| FK                | Prior3 | 0.4768                | 0.1630    | 0.1725 | 0.1878  | 0.6730           | 0.0707    | 0.1187 | 0.1376  |
| MH                | Prior3 | 0.4535                | 0.1512    | 0.1835 | 0.2118  | 0.4327           | 0.2059    | 0.1967 | 0.1648  |
| XY                | Prior3 | 0.2090                | 0.2605    | 0.2650 | 0.2655  | 0.2237           | 0.2459    | 0.2776 | 0.2528  |
| YL                | Prior3 | 0.3392                | 0.2010    | 0.2218 | 0.2380  | 0.3222           | 0.2048    | 0.2130 | 0.2600  |
| Merged population | Prior3 | 0.4075                | 0.1830    | 0.1980 | 0.2115  | 0.4174           | 0.1743    | 0.1930 | 0.2154  |

| Population | Prior  | rejection (tol=0.0005) |           |        |         | nnet (tol=0.0005) |           |        |         |
|------------|--------|------------------------|-----------|--------|---------|-------------------|-----------|--------|---------|
|            |        | Bottleneck             | Expansion | Stable | Decline | Bottleneck        | Expansion | Stable | Decline |
| DX         | Prior3 | 0.1915                 | 0.2630    | 0.2800 | 0.2655  | 0.1910            | 0.2584    | 0.2773 | 0.2733  |
| EM         | Prior3 | 0.5605                 | 0.1205    | 0.1555 | 0.1635  | 0.6039            | 0.0915    | 0.1429 | 0.1617  |
| FK         | Prior3 | 0.4785                 | 0.1520    | 0.1755 | 0.1940  | 0.5202            | 0.1324    | 0.1860 | 0.1614  |
| MH         | Prior3 | 0.4575                 | 0.1565    | 0.1800 | 0.2060  | 0.4545            | 0.1433    | 0.2134 | 0.1888  |
| XY         | Prior3 | 0.2050                 | 0.2575    | 0.2730 | 0.2645  | 0.2063            | 0.2486    | 0.2850 | 0.2601  |
| YL         | Prior3 | 0.3395                 | 0.2075    | 0.2145 | 0.2385  | 0.3486            | 0.2035    | 0.2114 | 0.2365  |

|                   |        |        |        |        |        |        |        |        |        |
|-------------------|--------|--------|--------|--------|--------|--------|--------|--------|--------|
| Merged population | Prior3 | 0.4065 | 0.1760 | 0.1955 | 0.2220 | 0.4132 | 0.1742 | 0.1907 | 0.2219 |
|-------------------|--------|--------|--------|--------|--------|--------|--------|--------|--------|

| Population        | Prior  | rejection (tol=0.0002) |           |        |         | nnet (tol=0.0002) |           |        |         |
|-------------------|--------|------------------------|-----------|--------|---------|-------------------|-----------|--------|---------|
|                   |        | Bottleneck             | Expansion | Stable | Decline | Bottleneck        | Expansion | Stable | Decline |
| DX                | Prior3 | 0.1963                 | 0.2575    | 0.2750 | 0.2713  | 0.1914            | 0.2592    | 0.2859 | 0.2635  |
| EM                | Prior3 | 0.5663                 | 0.1100    | 0.1713 | 0.1525  | 0.5505            | 0.1121    | 0.1729 | 0.1645  |
| FK                | Prior3 | 0.4838                 | 0.1650    | 0.1738 | 0.1775  | 0.4720            | 0.1689    | 0.1831 | 0.1759  |
| MH                | Prior3 | 0.4450                 | 0.1588    | 0.1900 | 0.2063  | 0.4540            | 0.1514    | 0.1949 | 0.1997  |
| XY                | Prior3 | 0.2113                 | 0.2513    | 0.2850 | 0.2525  | 0.2021            | 0.2536    | 0.2963 | 0.2480  |
| YL                | Prior3 | 0.3625                 | 0.2013    | 0.2075 | 0.2288  | 0.3577            | 0.2043    | 0.2103 | 0.2277  |
| Merged population | Prior3 | 0.4112                 | 0.1788    | 0.1938 | 0.2163  | 0.4202            | 0.1743    | 0.1961 | 0.2093  |

| Population        | Prior  | rejection (tol=0.01) |           |        |         | nnet (tol=0.01) |           |        |         |
|-------------------|--------|----------------------|-----------|--------|---------|-----------------|-----------|--------|---------|
|                   |        | Bottleneck           | Expansion | Stable | Decline | Bottleneck      | Expansion | Stable | Decline |
| DX                | Prior4 | 0.1437               | 0.2838    | 0.2868 | 0.2858  | 0.1361          | 0.2573    | 0.3217 | 0.2850  |
| EM                | Prior4 | 0.5659               | 0.1378    | 0.1465 | 0.1499  | 0.4649          | 0.2368    | 0.1889 | 0.1094  |
| FK                | Prior4 | 0.4998               | 0.1612    | 0.1671 | 0.1719  | 0.7623          | 0.0689    | 0.0784 | 0.0904  |
| MH                | Prior4 | 0.5173               | 0.1543    | 0.1606 | 0.1679  | 0.6396          | 0.1495    | 0.0840 | 0.1269  |
| XY                | Prior4 | 0.2233               | 0.2511    | 0.2611 | 0.2645  | 0.2951          | 0.1706    | 0.3076 | 0.2267  |
| YL                | Prior4 | 0.3936               | 0.1970    | 0.2005 | 0.2090  | 0.5272          | 0.1688    | 0.1438 | 0.1602  |
| Merged population | Prior4 | 0.4794               | 0.1685    | 0.1714 | 0.1806  | 0.4258          | 0.1874    | 0.1891 | 0.1976  |

| Population        | Prior  | rejection (tol=0.001) |           |        |         | nnet (tol=0.001) |           |        |         |
|-------------------|--------|-----------------------|-----------|--------|---------|------------------|-----------|--------|---------|
|                   |        | Bottleneck            | Expansion | Stable | Decline | Bottleneck       | Expansion | Stable | Decline |
| DX                | Prior4 | 0.1345                | 0.2870    | 0.2975 | 0.2810  | 0.1341           | 0.2806    | 0.3095 | 0.2758  |
| EM                | Prior4 | 0.6110                | 0.1277    | 0.1322 | 0.1290  | 0.7366           | 0.0772    | 0.1129 | 0.0733  |
| FK                | Prior4 | 0.5158                | 0.1522    | 0.1690 | 0.1630  | 0.5044           | 0.1373    | 0.1792 | 0.1791  |
| MH                | Prior4 | 0.5267                | 0.1427    | 0.1655 | 0.1650  | 0.5503           | 0.2123    | 0.1248 | 0.1126  |
| XY                | Prior4 | 0.2282                | 0.2498    | 0.2540 | 0.2680  | 0.2319           | 0.2502    | 0.2574 | 0.2606  |
| YL                | Prior4 | 0.3910                | 0.1930    | 0.2005 | 0.2155  | 0.4301           | 0.1758    | 0.1755 | 0.2185  |
| Merged population | Prior4 | 0.4795                | 0.1705    | 0.1608 | 0.1892  | 0.4656           | 0.1787    | 0.1641 | 0.1916  |

| Population        | Prior  | rejection (tol=0.0005) |           |        |         | nnet (tol=0.0005) |           |        |         |
|-------------------|--------|------------------------|-----------|--------|---------|-------------------|-----------|--------|---------|
|                   |        | Bottleneck             | Expansion | Stable | Decline | Bottleneck        | Expansion | Stable | Decline |
| DX                | Prior4 | 0.1340                 | 0.2805    | 0.3055 | 0.2800  | 0.1311            | 0.2802    | 0.3266 | 0.2621  |
| EM                | Prior4 | 0.6100                 | 0.1295    | 0.1340 | 0.1265  | 0.5910            | 0.1501    | 0.1420 | 0.1169  |
| FK                | Prior4 | 0.5090                 | 0.1575    | 0.1670 | 0.1665  | 0.4433            | 0.1293    | 0.2021 | 0.2253  |
| MH                | Prior4 | 0.5315                 | 0.1355    | 0.1690 | 0.1640  | 0.5384            | 0.1273    | 0.1699 | 0.1645  |
| XY                | Prior4 | 0.2245                 | 0.2565    | 0.2665 | 0.2525  | 0.2231            | 0.2591    | 0.2648 | 0.2530  |
| YL                | Prior4 | 0.3915                 | 0.1920    | 0.1985 | 0.2180  | 0.3983            | 0.1884    | 0.1974 | 0.2159  |
| Merged population | Prior4 | 0.4760                 | 0.1745    | 0.1580 | 0.1915  | 0.4693            | 0.1750    | 0.1655 | 0.1902  |

rejection (tol=0.0002)

nnet (tol=0.0002)

| <b>Population</b>    | <b>Prior</b> | <b>Bottleneck</b> | <b>Expansion</b> | <b>Stable</b> | <b>Decline</b> |  | <b>Bottleneck</b> | <b>Expansion</b> | <b>Stable</b> | <b>Decline</b> |
|----------------------|--------------|-------------------|------------------|---------------|----------------|--|-------------------|------------------|---------------|----------------|
| DX                   | Prior4       | 0.1425            | 0.2713           | 0.3163        | 0.2700         |  | 0.1468            | 0.2602           | 0.3255        | 0.2675         |
| EM                   | Prior4       | 0.6300            | 0.1200           | 0.1388        | 0.1113         |  | 0.6171            | 0.1210           | 0.1406        | 0.1212         |
| FK                   | Prior4       | 0.5088            | 0.1613           | 0.1663        | 0.1638         |  | 0.4804            | 0.1603           | 0.1776        | 0.1817         |
| MH                   | Prior4       | 0.5525            | 0.1175           | 0.1750        | 0.1550         |  | 0.5389            | 0.1273           | 0.1673        | 0.1665         |
| XY                   | Prior4       | 0.2150            | 0.2613           | 0.2750        | 0.2488         |  | 0.2189            | 0.2629           | 0.2723        | 0.2460         |
| YL                   | Prior4       | 0.4125            | 0.1825           | 0.1838        | 0.2213         |  | 0.3939            | 0.1838           | 0.1953        | 0.2270         |
| Merged<br>population | Prior4       | 0.4862            | 0.1775           | 0.1562        | 0.1800         |  | 0.4644            | 0.1681           | 0.1739        | 0.1936         |

Prior1, Prior2 and Prior3 are the three additional priors used to test the robustness of model selection in Approximate Bayesian Computations, while Prior4 is the formal prior that was applied to test the hypothesis on population demography for the *Malus sieversii* populations.
